# Supplementary material for: Mechanism of Mulberry Leaves and Black Sesame in Alleviating Slow Transit Constipation Revealed by Multi-Omics Analysis
Source: MDPI journal article supplement (doi:10.3390/molecules29081713), 2024-04-10
Supplement: s1 [file molecules-2919952-supplementary.xlsx]

## Sheet: DCPpos
Table S1 SH component analysis and identification results
No.	Name	Mass	Formula	CAS ID	class
1	(-)-11-hydroxy-9,10-dihydrojasmonic acid	228.136	C12 H20 O4		Fatty Acyls
2	(-)-11-Hydroxy-9,15,16-trioxooctadecanoic acid	342.205	C18 H30 O6	38076-39-0	Fatty Acyls
3	(-)-Dioxibrassinin	268.034	C11 H12 N2 O2 S2	133761-64-5	Carboxylic acids and derivatives
4	(+)-6-Methyl caprylic acid	158.13	C9 H18 O2		Fatty Acyls
5	(±)12,13-DiHOME	314.242	C18 H34 O4	263399-35-5	Fatty Acyls
6	(±)-Camphoric acid	200.105	C10 H16 O4	5394-83-2	Carboxylic acids and derivatives
7	(±)-CP 47,497-d11	329.326	C21 H23 D11 O2		Benzene and substituted derivatives
8	(10S)-Juvenile hormone III diol	284.2	C16 H28 O4		Hormones
9	(11Z)-8,18-methano-retinal	296.215	C21 H28 O		Prenol lipids
10	(1S,2S)-3-oxo-2-pentyl-cyclopentanehexanoic acid	268.204	C16 H28 O3		Fatty Acyls
11	(1S,2S,4S)-1,8-Epoxy-p-menthane-2,7-diol 2-O-b-D-glucoside	348.179	C16 H28 O8	219546-80-2	Organo oxygen compounds
12	(22E)-26,26,26,27,27,27-hexafluoro-25-hydroxy-22,23-didehydrovitamin D3 / (22E)-26,26,26,27,27,27-hexafluoro-25-hydroxy-22,23-didehydrocholecalciferol	506.262	C27 H36 F6 O2		Steroids and steroid derivatives
13	(23S)-23,25-dihdroxy-24-oxovitamine D3 23-(beta-glucuronide)	606.342	C33 H50 O10		Steroids and steroid derivatives
14	(3S,7E,9S)-9-Hydroxy-4,7-megastigmadien-3-one 9-glucoside	370.198	C19 H30 O7		Fatty Acyls
15	(4-tert-Butyl-phenoxy)-acetic acid	208.111	C12 H16 O3		Benzene and substituted derivatives
16	(6S)-vitamin D2 6,19-sulfur dioxide adduct / (6S)-ergocalciferol 6,19-sulfur dioxide adduct	460.301	C28 H44 O3 S		antioxidants
17	(9R,10S,12Z)-9,10-Dihydroxy-8-oxo-12-octadecenoic acid	328.225	C18 H32 O5	142036-13-3	Fatty Acyls
18	(9Z,11E,13E,15Z)-4-Oxo-9,11,13,15-octadecatetraenoic acid	290.188	C18 H26 O3	17699-21-7	Fatty Acyls
19	(E)-2-Methyl-2-buten-1-ol O-beta-D-Glucopyranoside	248.126	C11 H20 O6		Fatty Acyls
20	(R)-2-Amino-N-(2,2,4,4-tetramethyl-3-thietanyl)propanamide	216.131	C10 H20 N2 O S	80875-07-6	Thietanes
21	(x)-2-Heptanol glucoside	278.173	C13 H26 O6		Fatty Acyls
22	(Z)-5-Hexadecenoic acid	254.224	C16 H30 O2	7056-90-8	Fatty Acyls
23	[7]-Paradol	292.203	C18 H28 O3	53172-04-6	Phenols
24	1-(2-Pyrimidyl)piperazine	164.106	C8 H12 N4	20980-22-7	Diazinanes
25	1,1-Dihexyloxyethane	230.224	C14 H30 O2	5405-58-3	Organo oxygen compounds
26	1,1-Dimethoxynonane	188.177	C11 H24 O2	18824-63-0	Organo oxygen compounds
27	1,2,3,4,tetrahydro-1,5,7-trimethylnapthalene	174.14	C13 H18		Tetralins
28	1,2,3,4-Tetrahydro-1-[1-hydroxy-3-(4-hydroxyphenyl)-2-propenyl]-7-methoxy-2,6-naphthalenediol	342.147	C20 H22 O5	163811-77-6	Tetralins
29	1,2,3,4-Tetrahydro-6-propanoylpyridine	278.198	C16 H26 N2 O2		Pyridines and derivatives
30	1,2,4-Nonadecanetriol	316.298	C19 H40 O3		Fatty alcohols
31	1,2-beta-D-Glucuronosyl-D-glucuronate	370.074	C12 H18 O13		Organo oxygen compounds
32	1,2-Diethylhydrazine	88.0999	C4 H12 N2	1615-80-1	Organonitrogen compounds
33	1,2-dipalmitoyl-sn-glycero-3-phosphoethanolamine-N-(succinyl)	791.531	C41 H78 N O11 P	186800-61-3	Glycerophospholipids
34	1,8-Naphthyridine-3-carboxylic acid, 1-ethyl-1,4-dihydro-7-hydroxy-4-oxo-	234.063	C11 H10 N2 O4	54563-35-8	Organic acids
35	10-Deoxymethymycin	453.307	C25 H43 N O6		Organo oxygen compounds
36	11,12,15-trihydroxy palmitic acid	304.226	C16 H32 O5		Fatty Acyls
37	12-oxo-dodecanoic acid	214.157	C12 H22 O3		Fatty Acyls
38	12β-Hydroxy-3-oxo-5β-cholan-24-oic Acid	390.277	C24 H38 O4		Steroids
39	13(R)-HODE	296.236	C18 H32 O3	10219-69-9	Fatty Acyls
40	13(S)-HOTrE	294.219	C18 H30 O3	87984-82-5	Fatty Acyls
41	13-Deoxytedanolide	594.338	C32 H50 O10	134455-11-1	Macrolides and analogues
42	13-sophorosyloxydocosanoic acid	680.434	C34 H64 O13		Fatty Acyls
43	14,14,14-Trifluoro-11Z-tetradecenyl acetate	308.197	C16 H27 F3 O2		Carboxylic acids and derivatives
44	15-oxo-hexadecanoic acid	270.22	C16 H30 O3		Fatty Acyls
45	16-hydroperoxy-9Z,12,14E-octadecatrienoic acid	310.214	C18 H30 O4		Fatty Acyls
46	17beta-Hydroxy-4-mercaptoandrost-4-en-3-one 4-acetate 17-propionate	418.218	C24 H34 O4 S		Steroids and steroid derivatives
47	17beta-Pyrazol-3-ylandrost-5-en-3beta-ol	340.251	C22 H32 N2 O		Steroids and steroid derivatives
48	18-Oxooleate	296.235	C18 H32 O3		Fatty Acyls
49	19-hydroxy-nonadecanoic acid	314.282	C19 H38 O3		Fatty Acyls
50	1-Hexadecen-3-one	238.229	C16 H30 O		Organo oxygen compounds
51	1-Methyladenosine	281.113	C11 H15 N5 O4	15763-06-1	Purine nucleosides
52	1-Methylpiperazine	100.1	C5 H12 N2	109-01-3	Diazinanes
53	1-Monopalmitin	330.274	C19 H38 O4	542-44-9	Glycerolipids
54	1-O-Caffeoylquinic acid	354.097	C16 H18 O9	1241-87-8	Organo oxygen compounds
55	1-O-Galloylfructose	332.074	C13 H16 O10	94356-19-1	Benzene and substituted derivatives
56	1-Palmitoyllysophosphatidylcholine	496.338	C24 H51 N O7 P	17364-16-8	Phospholipids
57	1-Phenylbiguanide	177.101	C8 H11 N5	102-02-3	aromatic guanidine
58	1α-hydroxy-23-[3-(1-hydroxy-1-methylethyl)phenyl]-22,22,23,23-tetradehydro-24,25,26,27-tetranorvitamin D3 / 1α-hydroxy-23-[3-(1-hydroxy-1-methylethyl)phenyl]-22,22,23,23-tetradehydro-24,25,26,27-tetranorcholecalciferol	474.315	C32 H42 O3		vitamins
59	2,2'-(3-methylcyclohexane-1,1-diyl)diacetic acid	214.121	C11 H18 O4		Carboxylic acids and derivatives
60	2,2-dichloro-docosane-1,14-disulfate	570.186	C22 H44 Cl2 O8 S2		Organic sulfuric acids and derivatives
61	2,2-Dimethyl-3,4-bis(4-methoxyphenyl)-2H-1-benzopyran-7-ol acetate	430.178	C27 H26 O5		Isoflavonoids
62	2,3,2',3'-Tetrakis(3-hydroxytetradecanoyl)-D-glucosaminyl-1,6-β- D-glucosamine 1-phosphate	1324.89	C68 H129 N2 O20 P		glycolipid compound
63	2',3',5'-triacetyl-5-Azacytidine	370.113	C14 H18 N4 O8	10302-78-0	Organo oxygen compounds
64	2,3-dimethyl-3-hydroxy-glutaric acid	176.068	C7 H12 O5		Fatty Acyls
65	2,3-dinor Prostaglandin E1	326.209	C18 H30 O5	7046-40-4	Fatty Acyls
66	2,3-dinor Thromboxane B1	344.22	C18 H32 O6		Hydroxy acids and derivatives
67	2,4,6-Triethyl-1,3,5-trioxane	174.126	C9 H18 O3	2396-42-1	Trioxanes
68	2,7-Diethyl-1,6-dioxaspiro[4.4]nonane	184.146	C11 H20 O2		Organo oxygen compounds
69	2-amino-14,16-dimethyloctadecan-3-ol	313.334	C20 H43 N O		Organonitrogen compounds
70	2-amino-8-oxo-9,10-epoxy-decanoic acid	215.117	C10 H17 N O4		Carboxylic acids and derivatives
71	2-Chloroticlopidine	297.015	C14 H13 Cl2 N S		Thienopyridines
72	2-Diethylaminoethanol	117.115	C6 H15 N O	100-37-8	Aliphatic amines
73	2-Dodecylbenzenesulfonic acid	326.192	C18 H30 O3 S		Benzene and substituted derivatives
74	2-Hexyldecanoic acid	256.241	C16 H32 O2	25354-97-6	Fatty Acyls
75	2-Hydroxyhexadecanoic acid	272.236	C16 H32 O3	764-67-0	Fatty Acyls
76	2-Hydroxyisophthalic acid	182.022	C8 H6 O5	606-19-9	Benzene and substituted derivatives
77	2-Linoleoyl Glycerol	354.274	C21 H38 O4	3443-82-1	Fatty Acyls
78	2-Methoxymethcathinone	193.109	C11 H15 N O2		Cathinones
79	2-Methyladipic acid	160.073	C7 H12 O4	626-70-0	Fatty Acyls
80	2-Methylisoborneol	168.151	C11 H20 O		Prenol lipids
81	2-Methylpiperidine	99.1046	C6 H13 N	109-05-7	Piperidines
82	2-Octaprenyl-6-hydroxyphenol	654.54	C46 H70 O2		Prenol lipids
83	3-(2,5-Dimethoxyphenyl)propanoic acid	210.09	C11 H14 O4		Phenylpropanoic acids
84	3-(2-Methylpropanoyloxy)-8-(2-methylbutanoyloxy)-9,10-epoxy-p-mentha-1,3,5-triene	334.178	C19 H26 O5	22518-07-6	Terpenes
85	3,3',4,4'-Tetrahydroxy-5,5'-diisopropyl-2,2'-dimethylbiphenyl	330.184	C20 H26 O4	120901-51-1	Biphenyls
86	3,3-Difluoro-5alpha-androstan-17beta-yl acetate	354.236	C21 H32 F2 O2	1827-75-4	Steroids
87	3,3'-Thiobispropanoic acid	178.03	C6 H10 O4 S	111-17-1	Carboxylic acids and derivatives
88	3,4,4-Trimethyl-1,2-cyclopentanedione	140.083	C8 H12 O2	86702-81-0	Organo oxygen compounds
89	3,4-Dihydroxybenzaldehyde	138.031	C7 H6 O3	139-85-5	Organo oxygen compounds
90	3',4'-Methylenedioxy-alpha-pyrrolidinopropiophenone	247.122	C14 H17 N O3	24698-57-5	Benzodioxoles
91	3,5-Dichlorosalicylic acid	205.954	C7 H4 Cl2 O3	320-72-9	Salicylic acids
92	3,6,9-Heptacosatriene	374.39	C27 H50		Polyunsaturated hydrocarbons
93	3,6-Ditigloyloxytropan-7-ol	337.19	C18 H27 N O5	7159-86-6	Tropane alkaloids
94	3,7-Dimethyl-2E,6E-decadien-1,10-dioic acid	226.121	C12 H18 O4		Unsaturated fatty acids
95	3,7-Dimethyluric acid	196.06	C7 H8 N4 O3	13087-49-5	Imidazopyrimidines
96	3-[[5-Methyl-2-(1-methylethyl)cyclohexyl]oxy]-1,2-propanediol	230.189	C13 H26 O3	87061-04-9	Prenol lipids
97	3-capryl propionic acid	200.141	C11 H20 O3		Keto acids and derivatives
98	3-Ethenyl-2,5-dimethyl-4-oxohex-5-en-2-yl acetate	210.125	C12 H18 O3	79507-89-4	Organo oxygen compounds
99	3-hexanoyl-NBD Cholesterol	662.444	C39 H58 N4 O5		Steroids and steroid derivatives
100	3-Hydroxydodecanoic acid	216.173	C12 H24 O3	1883-13-2	Hydroxy acids and derivatives
101	3-Hydroxynonyl acetate	202.158	C11 H22 O3	60826-15-5	Fatty Acyls
102	3-Methyl valeric acid	116.084	C6 H12 O2	105-43-1	Fatty Acyls
103	3-Methylbutyl 2-furanbutanoate	224.142	C13 H20 O3	7779-66-0	Fatty Acyls
104	3-Oxovalproic acid	158.094	C8 H14 O3	60113-81-7	Keto acids and derivatives
105	3-Phenylpropyl glucosinolate	437.081	C16 H23 N O9 S2	76265-25-3	Glucosinolates
106	3-Pyrimidin-2-yl-2-pyrimidin-2-ylmethyl-Propionic Acid	244.095	C12 H12 N4 O2		Diazines
107	3R-hydroxypalmitic acid	272.234	C16 H32 O3		Fatty acids
108	3S,7S-dimethyl-tetradecan-2S-ol	242.261	C16 H34 O		Alcohols
109	4-(Methylnitrosamino)-1-(3-pyridyl)-1-butanol	209.117	C10 H15 N3 O2	76014-81-8	Pyridines and derivatives
110	4,4-Difluoropregn-5-ene-3,20-dione	350.207	C21 H28 F2 O2		Steroids and steroid derivatives
111	4,8-Dimethyl-1,3(E),7-nonatriene	152.157	C11 H20		Prenol lipids
112	4-Hydroxyphenylglyoxylate	166.027	C8 H6 O4		Benzene and substituted derivatives
113	4-keto stearic acid	298.251	C18 H34 O3		Fatty Acyls
114	4-Pyridoxic acid	183.055	C8 H9 N O4	82-82-6	Pyridines and derivatives
115	5,7,4'-Trihydroxy-6,3',5'-trimethoxyisoflavone 7-O-glucoside	522.138	C24 H26 O13		Isoflavonoids
116	5,7-Dihydro-2-methylthieno[3,4-d]pyrimidine	152.041	C7 H8 N2 S	36267-71-7	Thienopyrimidines
117	5alpha-Cholestane	372.374	C27 H48	481-21-0	Steroids and steroid derivatives
118	5-Butyltetrahydro-2-oxo-3-furancarboxylic acid	186.09	C9 H14 O4		Lactones
119	5-Chloro-1,2,4-trihydroxybenzene	159.993	C6 H5 Cl O3	119290-91-4	Phenols
120	5-Dodecyldihydro-2(3H)-furanone	254.225	C16 H30 O2	730-46-1	Lactones
121	5-hydroxysebacate	218.116	C10 H18 O5		Hydroxy acids and derivatives
122	5-Nonyltetrahydro-2-oxo-3-furancarboxylic acid	256.167	C14 H24 O4		Furans
123	5β-Cholestane-3α,7α-diol	404.365	C27 H48 O2		Steroids
124	6,7-Dimethyltetrahydropterin	195.112	C8 H13 N5 O	167423-51-0	Pterins
125	6,8-Di-C-alpha-L-arabinopyranosylapigenin	534.136	C25 H26 O13		Flavonoids
126	6-Gingerol	294.187	C17 H26 O4	23513-14-6	Phenols
127	6-Hydroxyindole	133.052	C8 H7 N O		Indoles and derivatives
128	6-keto Prostaglandin F1α-d4	374.262	C20 H30 D4 O6		Prostaglandins
129	6-pentadecyl Salicylic Acid	348.267	C22 H36 O3	16611-84-0	Benzene and substituted derivatives
130	7,8-dihydroxy stearic acid	316.262	C18 H36 O4		Fatty Acyls
131	7-Hydroxyenterolactone	314.115	C18 H18 O5		Furanoid lignans
132	7-Methyloctyl 5-methylhexanoate	256.24	C16 H32 O2		Esters
133	8-HpODE	312.23	C18 H32 O4		Fatty Acyls
134	8-Methyl-2-propyl-1,7-dioxaspiro[5.5]undecane	212.178	C13 H24 O2		Organo oxygen compounds
135	8-Oxodeoxycoformycin	266.101	C11 H14 N4 O4		Imidazodiazepines
136	9(R)-HODE	296.236	C18 H32 O3	10075-11-3	Fatty Acyls
137	9(Z),11(E)-Conjugated Linoleic Acid	280.24	C18 H32 O2	2540-56-9	Fatty Acyls
138	9,10-DiHOME(12)	314.247	C18 H34 O4		Fatty Acyls
139	9,10-dihydroxy-hexadecanoic acid	288.231	C16 H32 O4		Fatty Acyls
140	9,12,13-TriHOME(10)	330.24	C18 H34 O5		Fatty Acyls
141	9E,12Z,15E-octadecatrienoic acid	278.224	C18 H30 O2		Fatty Acyls
142	9-hydroperoxy-10E,12,15Z-octadecatrienoic acid	310.215	C18 H30 O4		Fatty Acyls
143	9-Hydroxy-7-megastigmen-3-one glucoside	372.214	C19 H32 O7		Fatty Acyls
144	9-OxoOTrE	292.2	C18 H28 O3	125559-74-2	Oxylipins
145	9S,10S,11R-trihydroxy-12Z,15Z-octadecadienoic acid	328.225	C18 H32 O5		Fatty Acyls
146	9S,10S,11R-trihydroxy-12Z-octadecenoic acid	330.239	C18 H34 O5		Fatty Acyls
147	A 80987	653.322	C37 H43 N5 O6	144141-97-9	Carboxylic acids and derivatives
148	AAPH	198.159	C8 H18 N6	2997-92-4	Organonitrogen compounds
149	Abu-TyrMe-OH	388.128	C19 H20 N2 O7		Peptides
150	Adenosine	267.095	C10 H13 N5 O4	58-61-7	Purine nucleosides
151	Aesculin	340.081	C15 H16 O9	531-75-9	Coumarins and derivatives
152	Ala Ile	202.129	C9 H18 N2 O3		Carboxylic acids and derivatives
153	Ala Ile Val	301.2	C14 H27 N3 O4		Carboxylic acids and derivatives
154	Allyl benzoate	162.068	C10 H10 O2	583-04-0	Benzene and substituted derivatives
155	Altretamine	210.159	C9 H18 N6	645-05-6	Organonitrogen compounds
156	Ambrettolic acid	270.219	C16 H30 O3		Fatty Acyls
157	Aminofluoropropionic acid	121.053	C4 H8 F N O2		Carboxylic acids and derivatives
158	Anabsin	512.279	C30 H40 O7	72542-39-3	Prenol lipids
159	Arg Asn Arg	444.255	C16 H32 N10 O5		Carboxylic acids and derivatives
160	Arg Gly Leu	344.217	C14 H28 N6 O4		Carboxylic acids and derivatives
161	Arg Ser Asn	375.186	C13 H25 N7 O6		Carboxylic acids and derivatives
162	Asitrilobin C	624.496	C37 H68 O7		Flavonoids
163	Asp Phe Trp	466.186	C24 H26 N4 O6		Carboxylic acids and derivatives
164	Astragalin	448.101	C21 H20 O11	480-10-4	Flavonoids
165	Auxin b	310.213	C18 H30 O4		Prenol lipids
166	Baicalein	270.055	C15 H10 O5	491-67-8	Flavonoids
167	Bancroftinone	210.089	C11 H14 O4	14964-98-8	Terpenes
168	b-D-Glucuronopyranosyl-(1->3)-a-D-galacturonopyranosyl-(1->2)-L-rhamnose	516.131	C18 H28 O17		Organo oxygen compounds
169	Betaine	118.085	C5 H12 N O2	590-46-5	Carboxylic acids and derivatives
170	Bopindolol	380.211	C23 H28 N2 O3	69010-88-4	Benzene and substituted derivatives
171	Butyl 4'-O-butanoyl-6-O-hexadecanoyl-neohesperidoside	690.453	C36 H66 O12		Saccharolipids
172	C-12 NBD-dihydro-Ceramide	661.476	C36 H63 N5 O6	474943-05-0	Sphingolipids
173	C16 Sphinganine	273.266	C16 H35 N O2		Organonitrogen compounds
174	C16:2n-6,8	252.209	C16 H28 O2		Fatty Acyls
175	C18 Sulfatide	807.555	C42 H81 N O11 S		Sulfatides
176	cadralazine	283.165	C12 H21 N5 O3	64241-34-5	Organonitrogen compounds
177	Caffeic Acid	180.042	C9 H8 O4	331-39-5	Cinnamic acids and derivatives
178	Calamendiol	238.193	C15 H26 O2	30167-28-3	Terpenes
179	Cannabinol	310.194	C21 H26 O2		Benzopyrans
180	Capric acid	172.146	C10 H20 O2	334-48-5	Fatty acids
181	Capsiate	306.183	C18 H26 O4		Phenols
182	Chlormephos	233.97	C5 H12 Cl O2 P S2	24934-91-6	Organic dithiophosphoric acids and derivatives
183	Chlorogenic Acid	354.094	C16 H18 O9	327-97-9	Phenylpropanoid compounds
184	cholesta-5,7,8(14),22E-tetraen-3-one	378.293	C27 H38 O		Steroids
185	Choline	104.106	C5 H14 N O	62-49-7	Organonitrogen compounds
186	Chondrosine	355.111	C12 H21 N O11		Fatty Acyls
187	Cibaric acid	324.194	C18 H28 O5	130523-93-2	Fatty Acyls
188	Cinnamyl propionate	190.1	C12 H14 O2	103-56-0	Esters
189	cis-7-Hexadecenoic Acid	254.222	C16 H30 O2	2416-19-5	Fatty Acyls
190	Codonocarpine	465.226	C26 H31 N3 O5	33442-48-7	Alkaloids
191	Cohibin D	576.51	C37 H68 O4		Peptides
192	Crocin 3	652.272	C32 H44 O14	55750-85-1	Prenol lipids
193	Cyclohexylammonium	99.105	C6 H13 N	108-91-8	Organonitrogen compounds
194	Cyromazine	166.096	C6 H10 N6	66215-27-8	Triazines
195	Cys Lys Thr	350.162	C13 H26 N4 O5 S		Peptides
196	Cys Trp Asp	422.127	C18 H22 N4 O6 S		Peptides
197	Deamino-α-keto-demethylphosphinothricin	166.003	C4 H7 O5 P		Amino acids
198	Debromoaplysiatoxin	592.325	C32 H48 O10	52423-28-6	Macrolides and analogues
199	Deethylatrazine	187.063	C6 H10 Cl N5	6190-65-4	Triazines
200	DehydroIndapamide	363.044	C16 H14 Cl N3 O3 S	63968-75-2	Benzene and substituted derivatives
201	Deidaclin	271.106	C12 H17 N O6	88824-26-4	Peptides
202	Desmethylnaproxen-6-O-sulfate	296.034	C13 H12 O6 S	69391-09-9	Sulfates
203	Dextromoramide	392.247	C25 H32 N2 O2	357-56-2	Opioids
204	DG(12:0/22:2(13Z,16Z)/0:0)[iso2]	592.506	C37 H68 O5		Glycerolipids
205	DG(12:0/22:3(10Z,13Z,16Z)/0:0)[iso2]	590.489	C37 H66 O5		Glycerolipids
206	DG(14:0/17:0/0:0)[iso2]	554.491	C34 H66 O5		Glycerolipids
207	DG(15:0/18:3(9Z,12Z,15Z)/0:0)	576.476	C36 H64 O5		Fatty Acyls
208	DG(15:1(9Z)/18:0/0:0)[iso2]	580.506	C36 H68 O5		Glycerolipids
209	DG(15:1(9Z)/18:1(9Z)/0:0)[iso2]	578.488	C36 H66 O5		Glycerolipids
210	DG(15:1(9Z)/19:0/0:0)[iso2]	594.519	C37 H70 O5		Glycerolipids
211	DG(16:0/17:2(9Z,12Z)/0:0)[iso2]	578.492	C36 H66 O5		Glycerolipids
212	DG(18:4(6Z,9Z,12Z,15Z)/22:3(10Z,13Z,16Z)/0:0)[iso2]	666.523	C43 H70 O5		Glycerolipids
213	DG(20:5(5Z,8Z,11Z,14Z,17Z)/22:5(7Z,10Z,13Z,16Z,19Z)/0:0)[iso2]	688.508	C45 H68 O5		Glycerolipids
214	Diacetylaminoazotoluene	309.147	C18 H19 N3 O2	83-63-6	Azobenzenes
215	Diamidafos	200.071	C8 H13 N2 O2 P	1754-58-1	Benzene and substituted derivatives
216	Diasarone 2	416.22	C24 H32 O6	80434-33-9	Indanes
217	Dibutyl malate	246.147	C12 H22 O5	2385-79-7	Hydroxy acids and derivatives
218	Dicyclohexyl disulfide	230.115	C12 H22 S2	2550-40-5	Organic disulfides
219	Dihydrocaffeic acid 3-O-glucuronide	358.091	C15 H18 O10		Phenolic acids
220	Dihydrocapsiate	308.198	C18 H28 O4		Phenols
221	Diisobutyl phthalate	278.151	C16 H22 O4	84-69-5	Phthalates
222	Dimethisterone	340.241	C23 H32 O2	79-64-1	Steroids and steroid derivatives
223	Dioctyl phthalate	390.275	C24 H38 O4	117-81-7	Benzene and substituted derivatives
224	Diprenorphine	425.256	C26 H35 N O4	14357-78-9	Phenanthrenes and derivatives
225	Dipropyl hexanedioate	230.151	C12 H22 O4	106-19-4	Fatty Acyls
226	Dipyridamole	504.319	C24 H40 N8 O4	58-32-2	Pyrimidines
227	DL-b-Hydroxycaprylic acid	160.11	C8 H16 O3		Fatty Acyls
228	DL-Tryptophan	204.087	C11 H12 N2 O2	1954-12-06	Indoles and derivatives
229	Docosahexaenoyl PAF C-16	792.593	C46 H83 N O7 P	132213-85-5	Glycerophospholipids
230	Dukunolide A	482.16	C26 H26 O9	97804-04-1	Terpenes
231	EHNA	277.19	C14 H23 N5 O	58337-38-5	Nucleosides
232	Elatine	694.348	C38 H50 N2 O10	26000-16-8	Alkaloids
233	enantio-PAF C-16	524.37	C26 H55 N O7 P	117985-57-6	Lipids
234	Enicoflavine	211.084	C10 H13 N O4	56050-08-9	Lactones
235	Enigmol	301.298	C18 H39 N O2		Terpenes
236	Epiafzelechin Trimethyl Ether	316.132	C18 H20 O5		Flavonoids
237	Epicatechin-(2beta->5,4beta->6)-ent-epicatechin	576.124	C30 H24 O12	135095-75-9	Flavonoids
238	Epigallocatechin 3-O-(3-O-methylgallate)	472.1	C23 H20 O11		Flavonoids
239	Estradiol disulfate	432.092	C18 H24 O8 S2	3233-70-3	Steroids and steroid derivatives
240	Ethyl 2-furanacrylate	166.063	C9 H10 O3	53282-12-5	Fatty Acyls
241	Ethyl 7-epi-12-hydroxyjasmonate glucoside	416.203	C20 H32 O9		Fatty Acyls
242	Ethyl isopropyl disulfide	136.038	C5 H12 S2	53966-36-2	Organic disulfides
243	Eucalyptol	154.136	C10 H18 O	470-82-6	Oxanes
244	FAPy-adenine	153.065	C5 H7 N5 O	5122-36-1	Diazines
245	Fenitropan	281.09	C13 H15 N O6	65934-95-4	Tropanes
246	Flumioxazin	354.103	C19 H15 F N2 O4	103361-09-7	Benzoxazines
247	Furfuryl thioacetate	156.025	C7 H8 O2 S	13678-68-7	Organosulfur compounds
248	gamma-tocopherol	416.365	C28 H48 O2		Prenol lipids
249	Ganoderic acid eta	532.303	C30 H44 O8	294674-12-7	Prenol lipids
250	Ganoderic acid F	570.284	C32 H42 O9	98665-15-7	Triterpenes
251	Ganoderic acid V1	514.295	C30 H42 O7	150033-91-3	Triterpenes
252	Geranyl acetoacetate	238.158	C14 H22 O3	10032-00-5	Fatty Acyls
253	Gibberellin A98	362.174	C20 H26 O6		Plant hormones
254	Gingerglycolipid A	676.366	C33 H56 O14	145937-22-0	Lipids
255	Gingerol	294.184	C17 H26 O4	58253-27-3	Phenols
256	GlcCer(d14:2(4E,6E)/16:0)	641.487	C36 H67 N O8		Fatty Acyls
257	GlcCer(d16:2(4E,6E)/22:0(2OH))	769.603	C44 H83 N O9		Fatty Acyls
258	Gln Phe Met	424.18	C19 H28 N4 O5 S		Peptides
259	Glu Arg Glu	432.198	C16 H28 N6 O8		Carboxylic acids and derivatives
260	Glu Asp Arg	418.182	C15 H26 N6 O8		Carboxylic acids and derivatives
261	Glu Lys Thr	376.194	C15 H28 N4 O7		Carboxylic acids and derivatives
262	Glu Trp Pro	430.187	C21 H26 N4 O6		Peptides
263	Gly Arg Lys	359.228	C14 H29 N7 O4		Peptides
264	Gly Asp Arg	346.16	C12 H22 N6 O6		Peptides
265	Glycerol tripropanoate	260.126	C12 H20 O6	139-45-7	Glycerolipids
266	Glyceryl 5-hydroxydecanoate	262.178	C13 H26 O5	26446-31-1	Lipids
267	Granisetron	312.196	C18 H24 N4 O	109889-09-0	Benzopyrazoles
268	Guazatine	355.342	C18 H41 N7	13516-27-3	Organonitrogen compounds
269	Harmalan	184.1	C12 H12 N2	525-41-7	Alkaloids
270	Heptanoic acid, 6-hydroxy-, (R)-	146.094	C7 H14 O3		Hydroxy acids and derivatives
271	Hercynine	198.124	C9 H16 N3 O2	534-30-5	Alkaloids
272	Hericene B	582.429	C37 H58 O5	157207-55-1	Prenol lipids
273	Hexadecan-3-one	240.245	C16 H32 O		Ketones
274	Hexyl (R)-3-hydroxybutyrate	188.141	C10 H20 O3		Esters
275	Homodihydrocapsaicin	321.23	C19 H31 N O3	20279-06-5	Alkaloids
276	Hydrastinine	207.089	C11 H13 N O3	4884-68-8	Tetrahydroisoquinolines
277	Hydroxy Linoleins	926.717	C57 H98 O9		Lipids
278	Hydroxytyrosol 1-O-glucoside	316.117	C14 H20 O8	76873-99-9	Organo oxygen compounds
279	Ibutilide	384.243	C20 H36 N2 O3 S	122647-31-8	Antiarrhythmic agents
280	ICI 164384	525.419	C34 H55 N O3	98007-99-9	Estrogens
281	IDFP	294.212	C15 H32 F O2 P	615250-02-7	Organic phosphonic acids and derivatives
282	Imiquimod	240.137	C14 H16 N4	99011-02-6	Quinolines and derivatives
283	Isoferuloyl C1-glucuronide	370.09	C16 H18 O10		Cinnamic acids and derivatives
284	Isolinderanolide	336.266	C21 H36 O3	139559-06-1	Terpenoids
285	Isoquercitrin	464.093	C21 H20 O12		Flavonoids
286	Isoscopoletin	192.041	C10 H8 O4	776-86-3	Coumarins and derivatives
287	IWR-1-endo	409.144	C25 H19 N3 O3	1127442-82-3	Benzene and substituted derivatives
288	Kaempferol-7-o-glucoside	448.107	C21 H20 O11	16290-07-6	Flavonoids
289	Kanzonol I	436.226	C27 H32 O5	152546-94-6	Isoflavonoids
290	Kanzonol R	370.178	C22 H26 O5	156250-73-6	Isoflavonoids
291	Ketanserinol	397.182	C22 H24 F N3 O3	76330-73-9	Alcohols
292	Ketoconazole Metabolite (1-Piperazinecarboxaldehyde, 4-[4-[[2-(2,4-dichlorophenyl)-2-(1H-imidazol-1-	516.133	C25 H26 Cl2 N4 O4	67914-70-9	Aldehydes
293	L-alpha-Amino-5-oxo-2(5H)-isoxazolepropanoic acid	172.049	C6 H8 N2 O4	59476-61-8	Amino acids
294	Laudanine	343.179	C20 H25 N O4	85-64-3	Isoquinolines and derivatives
295	Lauryl hydrogen sulfate	266.155	C12 H26 O4 S	151-21-3	Sulfates
296	LBPA(16:0/18:1(9Z))	748.528	C40 H77 O10 P		Glycerophospholipids
297	Leu Asp Trp	432.202	C21 H28 N4 O6		Peptides
298	Leucyl-Hydroxyproline	244.143	C11 H20 N2 O4		Peptides
299	L-Glutamic acid dibutyl ester	259.179	C13 H25 N O4	4261-76-1	Carboxylic acids and derivatives
300	Linoleic acid	280.237	C18 H32 O2	60-33-3	Fatty acids
301	L-Isoleucine	131.092	C6 H13 N O2	73-32-5	Amino acids
302	L-Olivosyl-oleandolide	516.294	C26 H44 O10		Macrolides and analogues
303	L-Phenylalanine	165.077	C9 H11 N O2	63-91-2	Amino acids
304	L-Tryptophan	204.088	C11 H12 N2 O2	73-22-3	Indoles and derivatives
305	Lucidenic acid M	462.299	C27 H42 O6	110241-33-3	Triterpenes
306	Luteolin 6-C-glucoside 8-C-arabinoside	610.153	C27 H30 O16		Flavonoids
307	Lys Met Glu	406.187	C16 H30 N4 O6 S		Peptides
308	Lysine-containing siolipin	684.564	C39 H76 N2 O7		Carboxylic acids and derivatives
309	Machaerol C	348.121	C18 H20 O7		Terpenes
310	Malic acid	134.023	C4 H6 O5	6915-15-7	Hydroxy acids and derivatives
311	Malyngamide J	607.373	C33 H53 N O9		Organo oxygen compounds
312	Mebeverine metabolite (Veratric acid glucuronide)	358.09	C15 H18 O10	19237-57-1	Metabolites
313	Met Met Arg	436.192	C16 H32 N6 O4 S2		Carboxylic acids and derivatives
314	Methantheline	340.192	C21 H26 N O3	5818-17-7	Anticholinergics
315	Methotrimeprazine	328.162	C19 H24 N2 O S	60-99-1	Benzothiazines
316	Methylgingerol	308.198	C18 H28 O4		Benzene and substituted derivatives
317	Methylpicraquassioside A	412.138	C19 H24 O10		Organo oxygen compounds
318	Metominostrobin	284.116	C16 H16 N2 O3	133408-50-1	Fungicides
319	MG(0:0/18:0/0:0)	358.307	C21 H42 O4		Glycerolipids
320	MG(16:0/0:0/0:0)[rac]	330.276	C19 H38 O4		Glycerolipids
321	MG(18:1(9Z)/0:0/0:0)[rac]	356.291	C21 H40 O4	111-03-5	Glycerolipids
322	MG(18:2(9Z,12Z)/0:0/0:0)[rac]	354.274	C21 H38 O4	26545-74-4	Fatty Acyls
323	Miglustat	219.147	C10 H21 N O4	72599-27-0	Piperidines
324	Minoxidil	209.127	C9 H15 N5 O	38304-91-5	Organonitrogen compounds
325	Mitoxantrone	444.203	C22 H28 N4 O6	65271-80-9	Chemotherapeutic agents
326	Monomenthyl succinate	256.168	C14 H24 O4	188709-97-9	Esters
327	Montanin	560.332	C32 H48 O8	66583-55-9	Prenol lipids
328	Muricatenol	608.499	C37 H68 O6		Terpenoids
329	Myricetin 7,3',4'-trimethyl ether	360.085	C18 H16 O8		Flavonoids
330	Myrsinone	294.183	C17 H26 O4	145040-57-9	Alkaloids
331	N-(14-Methylhexadecanoyl)pyrrolidine	323.318	C21 H41 N O	260058-83-1	Pyrrolidines
332	N-(1-Deoxy-1-fructosyl)phenylalanine	327.132	C15 H21 N O7	87251-83-0	Amino acid derivatives
333	N-(1-Deoxy-1-fructosyl)tryptophan	366.144	C17 H22 N2 O7	25020-15-9	Amino acid derivatives
334	N-(3S-hydroxydecanoyl)-L-serine	275.173	C13 H25 N O5		Lipids
335	N-(5-Methyl-3-oxohexyl)alanine	201.137	C10 H19 N O3		Carboxylic acids and derivatives
336	N(alpha)-t-Butoxycarbonyl-L-leucine	231.147	C11 H21 N O4		Amino acid derivatives
337	N-[(Ethoxycarbonyl)methyl)-p-menthane-3-carboxamide	269.2	C15 H27 N O3	68489-14-5	Carboxylic acids and derivatives
338	N3-Metyladenine	151.086	C6 H9 N5		Purines
339	N4-Acetylsulfadimidine	320.094	C14 H16 N4 O3 S	100-90-3	Sulfonamides
340	N6-Methylagmatine	144.138	C6 H16 N4	77414-15-4	Amines
341	Narciclasine	307.07	C14 H13 N O7	29477-83-6	Alkaloids
342	N-Benzooxazol-2-yl-guanidine	176.071	C8 H8 N4 O		Benzoxazoles
343	N-Benzoyl-D-arginine	278.137	C13 H18 N4 O3		Benzene and substituted derivatives
344	N-benzyl-1-methyl-1H-pyrazolo[3,4-d]pyrimidin-4-amine	239.117	C13 H13 N5		Heterocyclic compounds
345	N-Butyl-1H-pyrazolo[3,4-d]pyrimidin-4-amine	191.117	C9 H13 N5		Pyrazolopyrimidines
346	n-butyrl n-valeric acid	172.11	C9 H16 O3		Keto acids and derivatives
347	Nebramycin factor 4	526.26	C19 H38 N6 O11	51736-76-6	Organo oxygen compounds
348	Neoannonin B	606.486	C37 H66 O6	170312-94-4	Fatty Acyls
349	Neomycin C	614.315	C23 H46 N6 O13	66-86-4	Aminoglycoside antibiotics
350	N-Methyl-1-deoxynojirimycin	177.1	C7 H15 N O4	69567-10-8	Glycosidase inhibitors
351	N-methylundec-10-enamide	197.177	C12 H23 N O		Amides
352	N-Nitrosopyrrolidine	100.064	C4 H8 N2 O	930-55-2	Pyrrolidines
353	Nonate	188.105	C9 H16 O4		Fatty Acyls
354	Nordihydrocapsaicin	293.2	C17 H27 N O3	28789-35-7	Phenols
355	Norharman	168.069	C11 H8 N2	7259-44-1	Alkaloids
356	N-tetradecanoyl-L-Homoserine lactone	311.245	C18 H33 N O3	202284-87-5	Carboxylic acids and derivatives
357	N-Undecylbenzenesulfonic acid	312.177	C17 H28 O3 S	50854-94-9	Benzene and substituted derivatives
358	Octadecyl fumarate	368.293	C22 H40 O4	1741-93-1	Esters
359	Octan-3S-ol	130.136	C8 H18 O		Alcohols
360	O-Geranylvanillin	288.172	C18 H24 O3	151455-08-2	Prenol lipids
361	Oleic Acid	282.256	C18 H34 O2	112-80-1	Fatty Acyls
362	Oleic acid(d2)	284.269	C18 H32 D2 O2		Fatty Acyls
363	Oleoyl Ethanolamide	325.295	C20 H39 N O2	111-58-0	Amides
364	Oleoyl Ethyl Amide	309.301	C20 H39 N O	85075-82-7	Amides
365	Oxitropium	332.186	C19 H26 N O4	99571-64-9	Anticholinergics
366	Oxypinnatanine	260.101	C10 H16 N2 O6	52329-55-2	Alkaloids
367	Oxyquinoline	145.054	C9 H7 N O	148-24-3	Quinolines
368	PA(17:1(9Z)/0:0)	422.243	C20 H39 O7 P		Glycerophospholipids
369	PA(O-16:0/16:0)	634.493	C35 H71 O7 P		Phospholipids
370	PAF C-16	524.37	C26 H55 N O7 P	74389-68-7	Phospholipids
371	Palmitoyl Ethanolamide	299.278	C18 H37 N O2	544-31-0	Amides
372	Palmitoyl-EA	299.282	C18 H37 N O2		Amides
373	Panaquinquecol 7	276.171	C17 H24 O3	155519-47-4	Fatty Acyls
374	Panaxydol linoleate	522.409	C35 H54 O3	155551-19-2	Fatty acid esters
375	Pandaroside B	634.373	C35 H54 O10		Glycosides
376	Pantothenic Acid	219.109	C9 H17 N O5	137-08-6	Vitamins
377	para-Trifluoromethylphenol	162.029	C7 H5 F3 O		Phenols
378	Patuletin 3-rhamnoside-7-(3''',4'''-diacetylrhamnoside)	708.188	C32 H36 O18		Flavonoid
379	Patulin	154.027	C7 H6 O4	149-29-1	Pyrans
380	PC(14:0/14:0)	678.505	C36 H73 N O8 P		Glycerophospholipids
381	PC(14:1(9Z)/14:1(9Z))	674.474	C36 H69 N O8 P		Glycerophospholipids
382	PC(22:2(13Z,16Z)/15:1(9Z))	798.603	C45 H85 N O8 P		Glycerophospholipids
383	PC(6:2(3E,5E)/14:2(11E,13E))	558.319	C28 H49 N O8 P		Glycerophospholipids
384	PC(O-15:0/20:4(5Z,8Z,11Z,14Z))[U]	754.576	C43 H81 N O7 P		Phospholipids
385	PC(O-16:0/0:0)[U]	482.361	C24 H53 N O6 P		Phospholipids
386	PC(O-6:0/0:0)[U]	342.205	C14 H33 N O6 P		Phospholipids
387	PC(O-8:0/O-16:0)[U]	594.484	C32 H69 N O6 P		Phospholipids
388	PE(18:1(9Z)/0:0)	479.301	C23 H46 N O7 P	89576-29-4	Glycerophospholipids
389	PE-Cer(d16:2(4E,6E)/18:0(2OH))	674.501	C36 H71 N2 O7 P		Organic phosphoric acids and derivatives
390	PG(14:1(9Z)/14:1(9Z))	662.413	C34 H63 O10 P		Glycerophospholipids
391	PG(20:3(8Z,11Z,14Z)/14:0)	744.496	C40 H73 O10 P		Glycerophospholipids
392	PG(P-18:0/18:2(9Z,12Z))	758.546	C42 H79 O9 P		Phospholipids
393	Phe4Cl-Met-OH	438.066	C19 H19 Cl N2 O6 S		Peptides
394	Phe4Cl-TyrMe-OH	484.102	C24 H21 Cl N2 O7		Peptides
395	Phenformin	205.133	C10 H15 N5	114-86-3	Biguanides
396	Phenylalanyl-Isoleucine	278.163	C15 H22 N2 O3		Dipeptides
397	PHOP	294.137	C18 H18 N2 O2	288862-83-9	Oxazolopyridines
398	phorbol 13-acetate 12-myristate	616.398	C36 H56 O8		Prenol lipids
399	Phthalic acid Mono-2-ethylhexyl Ester	278.151	C16 H22 O4	4376-20-9	Esters
400	Physalin O	528.201	C28 H32 O10	120849-18-5	Steroids and steroid derivatives
401	Phytosphingosine	317.292	C18 H39 N O3	554-62-1	Sphingolipids
402	PI(16:0/0:0)	572.295	C25 H49 O12 P		Glycerophospholipids
403	PI(18:1(9Z)/0:0)	598.313	C27 H51 O12 P		Glycerophospholipids
404	PI(18:2(9Z,12Z)/0:0)	596.294	C27 H49 O12 P		Glycerophospholipids
405	PI(18:3(9Z,12Z,15Z)/0:0)	594.283	C27 H47 O12 P		Glycerophospholipids
406	PI(22:0/21:0)	964.698	C52 H101 O13 P		Glycerophospholipids
407	PI(O-16:0/18:0)	824.576	C43 H85 O12 P		Glycerophospholipids
408	PI(P-16:0/0:0)	556.301	C25 H49 O11 P		Glycerophospholipids
409	Pinacidil-N-Oxide	261.159	C13 H19 N5 O	83285-82-9	Potassium channel opener
410	Poloxalene	164.105	C7 H16 O4		Protectant
411	Polyethylene, oxidized	244.131	C12 H20 O5	68441-17-8	Polymer
412	Pralidoxime	137.072	C7 H9 N2 O	154-97-2	Antidote
413	Pro Arg Ala	342.2	C14 H26 N6 O4		Peptide
414	Pro His Asn	366.164	C15 H22 N6 O5		Peptide
415	Pro Trp Gly	358.163	C18 H22 N4 O4		Peptide
416	Prostaglandin B2-d4	338.241	C20 H26 D4 O4		Fatty Acyls
417	Prostaglandin E1-d4	358.267	C20 H30 D4 O5		Prostaglandin
418	Prostaglandin F2α-biotin	664.425	C35 H60 N4 O6 S		Prostaglandin
419	PS(13:0/20:0)	749.52	C39 H76 N O10 P		Glycerophospholipids
420	PS(14:0/22:0)	791.565	C42 H82 N O10 P		Phospholipid
421	PS(15:0/16:0)	721.489	C37 H72 N O10 P		Phospholipid
422	PS(21:0/0:0)	567.353	C27 H54 N O9 P		Glycerophospholipids
423	Pyridine	79.0426	C5 H5 N	110-86-1	Heterocyclic compound
424	Pyridine-2-azo-p-dimethylaniline	226.122	C13 H14 N4		Azo compound
425	Pyriminobac-methyl	361.127	C17 H19 N3 O6	147411-69-6	Fungicide
426	Pyrophaeophorbide a	534.264	C33 H34 N4 O3	24533-72-0	Chlorophyll derivative
427	Quercetin 3-(2G-rhamnosylgentiobioside)	772.207	C33 H40 O21		Flavonoid
428	Quercetin 3-(3'',4''-diacetylrhamnosyl)-(1->6)-glucoside	694.175	C31 H34 O18		Flavonoids
429	Quercetin 3-beta-laminaribioside	626.147	C27 H30 O17	171828-58-3	Flavonoid
430	Quercetin 3-galactoside	464.097	C21 H20 O12	482-36-0	Flavonoids
431	Quercetin 3-sambubioside-3'-glucoside	758.192	C32 H38 O21		Flavonoid
432	Quinacridone	312.091	C20 H12 N2 O2	1047-16-1	Quinolines and derivatives
433	R-138727	349.115	C18 H20 F N O3 S	204204-73-9	Benzene and substituted derivatives
434	R-2-Hydroxy-3-methylbutanoic acid 3-Methylbutanoyl	202.12	C10 H18 O4		Fatty Acyls
435	Remoxipride	370.09	C16 H23 Br N2 O3	80125-14-0	Antipsychotic drug
436	Riboflavin (Vitamin B2)	376.14	C17 H20 N4 O6	83-88-5	Vitamin
437	Ridentin	264.137	C15 H20 O4	28148-84-7	Prenol lipids
438	Rinderine	299.174	C15 H25 N O5	6029-84-1	Alkaloid
439	Ripazepam	268.133	C15 H16 N4 O	26308-28-1	Benzene and substituted derivatives
440	Rosaniline	301.159	C20 H19 N3	632-99-5	Dye
441	Rosmarinate	360.088	C18 H16 O8	537-15-5	Cinnamic acids and derivatives
442	R-Palmitoyl-(2-methyl) Ethanolamide	313.297	C19 H39 N O2	179951-56-5	Lipid
443	Rutin	610.156	C27 H30 O16	153-18-4	Flavonoids
444	S-(N-Hydroxy-N-methylcarbamoyl)glutathione	380.1	C12 H20 N4 O8 S	144810-23-1	Peptide
445	S-4-benzyl-3-((S)-3-hydroxy-2,2-dimethyloctanoyl)-5,5-dimethyloxazolidin-2-one	375.24	C22 H33 N O4		Azolidines
446	Semilicoisoflavone B	352.095	C20 H16 O6		Flavonoid
447	Ser Arg Gly	318.166	C11 H22 N6 O5		Carboxylic acids and derivatives
448	Sesamin	354.353	C20H18O6	13079-95-3	Lignan
449	Sesamolin	370.353	C20H18O7	526-07-8	Lignan
450	Sesamolinol 4'-O-b-D-glucosyl (1->6)-O-b-D-glucoside	696.228	C32 H40 O17		Organo oxygen compounds
451	Setarin	202.062	C12 H10 O3	31005-07-9	Protein
452	SLF	524.288	C30 H40 N2 O6		Flavonoid
453	SM(d18:2/18:1)	727.577	C41 H80 N2 O6 P		Organonitrogen compounds
454	S-Methyl-1-thio-D-glycerate	136.019	C4 H8 O3 S		Thioester
455	S-Octyl GSH	419.21	C18 H33 N3 O6 S		Glutathione analog
456	Sodium Tetradecyl Sulfate	294.187	C14 H30 O4 S	1191-50-0	Organic sulfuric acids and derivatives
457	soladulcidine	415.345	C27 H45 N O2		Steroids and steroid derivatives
458	Spectinomycin adenylate	661.209	C24 H36 N7 O13 P	27544-31-6	Antibiotic
459	Spisulosine	285.303	C18 H39 N O		Marine natural product
460	Squamosinin A	622.446	C36 H62 O8	163597-71-5	Fatty Acyls
461	Stearamide	283.285	C18 H37 N O	124-26-5	Fatty acid derivative
462	Stearoylethanolamide	327.312	C20 H41 N O2	111-57-9	Endocannabinoid
463	Succinic acid	118.027	C4 H6 O4	110-15-6	Carboxylic acids and derivatives
464	Sudachiin A	522.138	C24 H26 O13	70575-17-6	Flavonoids
465	Suillusin	370.07	C19 H14 O8		Peptide
466	Suloctidil	337.244	C20 H35 N O S	54063-56-8	Vasodilator
467	Tetrafluoroethylene	99.9935	C2 F4	116-14-3	Fluorocarbon
468	Tetrahydrogambogic Acid	632.337	C38 H48 O8		Natural product
469	Tetranor Iloprost	306.183	C18 H26 O4	93220-69-0	Prostaglandin analog
470	Thalictroidine	233.141	C14 H19 N O2	248259-06-5	Alkaloid
471	Theophylline	180.065	C7 H8 N4 O2	58-55-9	Imidazopyrimidines
472	Thiofanox	218.109	C9 H18 N2 O2 S	39196-18-4	Carboximidic acids and derivatives
473	Thioxolone	167.988	C7 H4 O3 S	4991-65-5	Organic compound
474	Thr Gly Ser	263.113	C9 H17 N3 O6		Amino acid sequence
475	Torvoside F	902.483	C45 H74 O18		Saponin
476	trans-Hexadec-2-enoyl carnitine	398.328	C23 H44 N O4		Fatty acyl carnitine
477	Traumatic Acid	228.133	C12 H20 O4	6402-36-4	Carboxylic acid
478	TrHA	342.257	C23 H34 O2		isonicotinic acid hydrazide
479	Triamcinolone acetonide sulfate	514.169	C24 H31 F O9 S	1109-37-1	Corticosteroid
480	Triethyl citrate	276.121	C12 H20 O7	77-93-0	Carboxylic acids and derivatives
481	Triethylene glycol diglycidyl ether	262.14	C12 H22 O6	1954-28-5	Epoxides
482	trifluoroacetic acid	113.993	C2 H F3 O2	76-05-01	Carboxylic acids and derivatives
483	Triphenyl phosphate	326.069	C18 H15 O4 P	115-86-6	Organophosphate
484	Trospium	392.222	C25 H30 N O3	10405-02-4	Anticholinergic drug
485	Trp Cys Glu	436.14	C19 H24 N4 O6 S		Carboxylic acids and derivatives
486	Trp Ile Thr	418.221	C21 H30 N4 O5		Carboxylic acids and derivatives
487	Trp Pro Leu	414.227	C22 H30 N4 O4		Carboxylic acids and derivatives
488	Trp Thr Pro	402.191	C20 H26 N4 O5		Carboxylic acids and derivatives
489	Tyr Arg Asp	452.203	C19 H28 N6 O7		Carboxylic acids and derivatives
490	Tyr Ile Lys	422.252	C21 H34 N4 O5		Carboxylic acids and derivatives
491	Undecan-4-one	170.167	C11 H22 O		Ketone
492	Uplandicine	357.18	C17 H27 N O7	74202-10-1	Alkaloid
493	Uvaricin	648.494	C39 H68 O7	82064-83-3	Antibiotic
494	Vaccenic acid	282.253	C18 H34 O2	693-72-1	Fatty acid
495	Val Arg Pro	370.232	C16 H30 N6 O4		Carboxylic acids and derivatives
496	Val Ile	230.161	C11 H22 N2 O3		Dipeptide
497	Vitamin E succinate(tocopherol succinate)	530.398	C33 H54 O5	4345-03-03	Prenol lipids
498	xi-1-Butoxy-1-methoxyethane	132.115	C7 H16 O2		Ether
499	Ximelagatran	473.262	C24 H35 N5 O5	192939-46-1	Anticoagulant
500	Yuccaol C	542.124	C30 H22 O10		Flavonoid
501	ZM 447439	513.238	C29 H31 N5 O4	331771-20-1	Benzene and substituted derivatives
502	Zymonic acid	158.022	C6 H6 O5	24891-71-2	Organic acid
503	α-Linolenic acid	278.43	C18 H30 O2	463-40-1	Fatty acid
504	γ- 12,13-DiHODE	312.23	C18 H32 O4		Fatty Acyls

## Sheet: Sheet1
Chemical Name	Superclass	Class
N-Methyl-1-deoxynojirimycin	Organoheterocyclic compounds	Piperidines
3-Phenylpropyl glucosinolate	Organic oxygen compounds	Organooxygen compounds
9-OxoOTrE	Lipids and lipid-like molecules	Fatty Acyls
9-OxoOTrE	Lipids and lipid-like molecules	Fatty Acyls
Dihydrocaffeic acid 3-O-glucuronide	Organic oxygen compounds	Organooxygen compounds
Phytosphingosine	Organic nitrogen compounds	Organonitrogen compounds
Phytosphingosine	Organic nitrogen compounds	Organonitrogen compounds
L-Isoleucine	Organic acids and derivatives	Carboxylic acids and derivatives
L-Isoleucine	Organic acids and derivatives	Carboxylic acids and derivatives
Calamendiol	Lipids and lipid-like molecules	Prenol lipids
Norharman	Organoheterocyclic compounds	Indoles and derivatives
cholesta-5,7,8(14),22E-tetraen-3-one	Lipids and lipid-like molecules	Steroids and steroid derivatives
Homodihydrocapsaicin	Benzenoids	Phenols
Ibutilide	Benzenoids	Benzene and substituted derivatives
6,7-Dimethyltetrahydropterin	Organoheterocyclic compounds	Pteridines and derivatives
Riboflavin (Vitamin B2)	Organoheterocyclic compounds	Pteridines and derivatives
Rosaniline	Benzenoids	Benzene and substituted derivatives
Fenitropan	Benzenoids	Benzene and substituted derivatives
Patuletin 3-rhamnoside-7-(3''',4'''-diacetylrhamnoside)	Phenylpropanoids and polyketides	Flavonoids
1,2,4-Nonadecanetriol	Lipids and lipid-like molecules	Fatty Acyls
Dukunolide A	Organoheterocyclic compounds	Naphthopyrans
para-Trifluoromethylphenol	Benzenoids	Benzene and substituted derivatives
para-Trifluoromethylphenol	Benzenoids	Benzene and substituted derivatives
Asitrilobin C	Lipids and lipid-like molecules	Fatty Acyls
L-alpha-Amino-5-oxo-2(5H)-isoxazolepropanoic acid	Organic acids and derivatives	Carboxylic acids and derivatives
Suloctidil	Benzenoids	Benzene and substituted derivatives
Tetrafluoroethylene	Organohalogen compounds	Vinyl halides
2-Diethylaminoethanol	Organic nitrogen compounds	Organonitrogen compounds
Monomenthyl succinate	Lipids and lipid-like molecules	Prenol lipids
Monomenthyl succinate	Lipids and lipid-like molecules	Prenol lipids
Desmethylnaproxen-6-O-sulfate	Benzenoids	Naphthalenes
Oleoyl Ethanolamide	Organic nitrogen compounds	Organonitrogen compounds
7-Methyloctyl 5-methylhexanoate	Lipids and lipid-like molecules	Fatty Acyls
7-Methyloctyl 5-methylhexanoate	Lipids and lipid-like molecules	Fatty Acyls
7-Methyloctyl 5-methylhexanoate	Lipids and lipid-like molecules	Fatty Acyls
3,3-Difluoro-5alpha-androstan-17beta-yl acetate	Lipids and lipid-like molecules	Steroids and steroid derivatives
3,3',4,4'-Tetrahydroxy-5,5'-diisopropyl-2,2'-dimethylbiphenyl	Benzenoids	Benzene and substituted derivatives
3R-hydroxypalmitic acid	Lipids and lipid-like molecules	Fatty Acyls
3R-hydroxypalmitic acid	Lipids and lipid-like molecules	Fatty Acyls
3R-hydroxypalmitic acid	Lipids and lipid-like molecules	Fatty Acyls
3R-hydroxypalmitic acid	Lipids and lipid-like molecules	Fatty Acyls
N6-Methylagmatine	Organic nitrogen compounds	Organonitrogen compounds
Enigmol	Organic nitrogen compounds	Organonitrogen compounds
3,6,9-Heptacosatriene	Hydrocarbons	Unsaturated hydrocarbons
3,5-Dichlorosalicylic acid	Benzenoids	Benzene and substituted derivatives
L-Phenylalanine	Organic acids and derivatives	Carboxylic acids and derivatives
L-Phenylalanine	Organic acids and derivatives	Carboxylic acids and derivatives
Ketanserinol	Organoheterocyclic compounds	Diazanaphthalenes
Ketanserinol	Organoheterocyclic compounds	Diazanaphthalenes
1-Phenylbiguanide	Organic nitrogen compounds	Organonitrogen compounds
Harmalan	Alkaloids and derivatives	Harmala alkaloids
Chlorogenic Acid	Organic oxygen compounds	Organooxygen compounds
Chlorogenic Acid	Organic oxygen compounds	Organooxygen compounds
Chlorogenic Acid	Organic oxygen compounds	Organooxygen compounds
Tetrahydrogambogic Acid	Organoheterocyclic compounds	Benzopyrans
3-(2-Methylpropanoyloxy)-8-(2-methylbutanoyloxy)-9,10-epoxy-p-mentha-1,3,5-triene	Benzenoids	Phenol esters
3,7-Dimethyl-2E,6E-decadien-1,10-dioic acid	Lipids and lipid-like molecules	Prenol lipids
Deethylatrazine	Organoheterocyclic compounds	Triazines
xi-1-Butoxy-1-methoxyethane	Organic oxygen compounds	Organooxygen compounds
Thr Gly Ser
Phthalic acid Mono-2-ethylhexyl Ester	Benzenoids	Benzene and substituted derivatives
Phthalic acid Mono-2-ethylhexyl Ester	Benzenoids	Benzene and substituted derivatives
Phthalic acid Mono-2-ethylhexyl Ester	Benzenoids	Benzene and substituted derivatives
Phthalic acid Mono-2-ethylhexyl Ester	Benzenoids	Benzene and substituted derivatives
Phthalic acid Mono-2-ethylhexyl Ester	Benzenoids	Benzene and substituted derivatives
Phthalic acid Mono-2-ethylhexyl Ester	Benzenoids	Benzene and substituted derivatives
Phthalic acid Mono-2-ethylhexyl Ester	Benzenoids	Benzene and substituted derivatives
Phthalic acid Mono-2-ethylhexyl Ester	Benzenoids	Benzene and substituted derivatives
Phthalic acid Mono-2-ethylhexyl Ester	Benzenoids	Benzene and substituted derivatives
Phthalic acid Mono-2-ethylhexyl Ester	Benzenoids	Benzene and substituted derivatives
Phthalic acid Mono-2-ethylhexyl Ester	Benzenoids	Benzene and substituted derivatives
Phthalic acid Mono-2-ethylhexyl Ester	Benzenoids	Benzene and substituted derivatives
Phthalic acid Mono-2-ethylhexyl Ester	Benzenoids	Benzene and substituted derivatives
Phthalic acid Mono-2-ethylhexyl Ester	Benzenoids	Benzene and substituted derivatives
Phthalic acid Mono-2-ethylhexyl Ester	Benzenoids	Benzene and substituted derivatives
Phthalic acid Mono-2-ethylhexyl Ester	Benzenoids	Benzene and substituted derivatives
Phthalic acid Mono-2-ethylhexyl Ester	Benzenoids	Benzene and substituted derivatives
Phthalic acid Mono-2-ethylhexyl Ester	Benzenoids	Benzene and substituted derivatives
Phthalic acid Mono-2-ethylhexyl Ester	Benzenoids	Benzene and substituted derivatives
Phthalic acid Mono-2-ethylhexyl Ester	Benzenoids	Benzene and substituted derivatives
Phthalic acid Mono-2-ethylhexyl Ester	Benzenoids	Benzene and substituted derivatives
Phthalic acid Mono-2-ethylhexyl Ester	Benzenoids	Benzene and substituted derivatives
5-Nonyltetrahydro-2-oxo-3-furancarboxylic acid	Organoheterocyclic compounds	Lactones
Pro Trp Gly
1,2,3,4-Tetrahydro-6-propanoylpyridine	Organoheterocyclic compounds	Pyridines and derivatives
Lucidenic acid M	Lipids and lipid-like molecules	Prenol lipids
Pinacidil-N-Oxide	Organoheterocyclic compounds	Pyridines and derivatives
(-)-11-Hydroxy-9,15,16-trioxooctadecanoic acid	Lipids and lipid-like molecules	Fatty Acyls
(-)-11-Hydroxy-9,15,16-trioxooctadecanoic acid	Lipids and lipid-like molecules	Fatty Acyls
Bancroftinone	Organic oxygen compounds	Organooxygen compounds
(-)-Dioxibrassinin	Organic acids and derivatives	Carboxylic acids and derivatives
10-Deoxymethymycin	Organic oxygen compounds	Organooxygen compounds
Thalictroidine	Organic oxygen compounds	Organooxygen compounds
N-(1-Deoxy-1-fructosyl)phenylalanine	Organic acids and derivatives	Carboxylic acids and derivatives
(4-tert-Butyl-phenoxy)-acetic acid	Benzenoids	Benzene and substituted derivatives
Pyrophaeophorbide a	Organoheterocyclic compounds	Tetrapyrroles and derivatives
Ganoderic acid V1	Lipids and lipid-like molecules	Prenol lipids
Oxypinnatanine	Organic acids and derivatives	Carboxylic acids and derivatives
Codonocarpine	Phenylpropanoids and polyketides	Macrolactams
Zymonic acid	Organoheterocyclic compounds	Dihydrofurans
Zymonic acid	Organoheterocyclic compounds	Dihydrofurans
3,6-Ditigloyloxytropan-7-ol	Alkaloids and derivatives	Tropane alkaloids
1-Methyladenosine	Nucleosides, nucleotides, and analogues	Purine nucleosides
TrHA	Lipids and lipid-like molecules	Fatty Acyls
Pantothenic Acid	Organic oxygen compounds	Organooxygen compounds
Capric acid	Lipids and lipid-like molecules	Fatty Acyls
Capric acid	Lipids and lipid-like molecules	Fatty Acyls
Capric acid	Lipids and lipid-like molecules	Fatty Acyls
Prostaglandin E1-d4	Lipids and lipid-like molecules	Fatty Acyls
Hercynine	Organic acids and derivatives	Carboxylic acids and derivatives
Cohibin D	Lipids and lipid-like molecules	Fatty Acyls
C18 Sulfatide	Lipids and lipid-like molecules	Sphingolipids
Remoxipride	Benzenoids	Benzene and substituted derivatives
2,4,6-Triethyl-1,3,5-trioxane	Organoheterocyclic compounds	Trioxanes
2,4,6-Triethyl-1,3,5-trioxane	Organoheterocyclic compounds	Trioxanes
2,4,6-Triethyl-1,3,5-trioxane	Organoheterocyclic compounds	Trioxanes
Methantheline	Organoheterocyclic compounds	Benzopyrans
Deidaclin	Organic oxygen compounds	Organooxygen compounds
Isolinderanolide	Organoheterocyclic compounds	Tetrahydrofurans
Metominostrobin	Benzenoids	Benzene and substituted derivatives
PAF C-16	Lipids and lipid-like molecules	Glycerophospholipids
enantio-PAF C-16	Lipids and lipid-like molecules	Glycerophospholipids
Palmitoyl-EA	Organic acids and derivatives	Carboximidic acids and derivatives
Palmitoyl Ethanolamide	Organic acids and derivatives	Carboximidic acids and derivatives
Palmitoyl-EA	Organic acids and derivatives	Carboximidic acids and derivatives
Phenformin	Organic nitrogen compounds	Organonitrogen compounds
N3-Metyladenine	Organoheterocyclic compounds	Imidazopyrimidines
2-Linoleoyl Glycerol	Lipids and lipid-like molecules	Fatty Acyls
SLF	Phenylpropanoids and polyketides	Linear 1,3-diarylpropanoids
Rutin	Phenylpropanoids and polyketides	Flavonoids
Glyceryl 5-hydroxydecanoate	Lipids and lipid-like molecules	Fatty Acyls
1,2-beta-D-Glucuronosyl-D-glucuronate	Organic oxygen compounds	Organooxygen compounds
Dextromoramide	Benzenoids	Benzene and substituted derivatives
2-Chloroticlopidine	Organoheterocyclic compounds	Thienopyridines
Pyridine-2-azo-p-dimethylaniline	Organic nitrogen compounds	Organonitrogen compounds
EHNA	Organoheterocyclic compounds	Imidazopyrimidines
EHNA	Organoheterocyclic compounds	Imidazopyrimidines
EHNA	Organoheterocyclic compounds	Imidazopyrimidines
Gly Asp Arg	Organic acids and derivatives	Carboxylic acids and derivatives
Dipyridamole	Organic nitrogen compounds	Organonitrogen compounds
Dipyridamole	Organic nitrogen compounds	Organonitrogen compounds
Pralidoxime	Organoheterocyclic compounds	Pyridines and derivatives
Pralidoxime	Organoheterocyclic compounds	Pyridines and derivatives
Leucyl-Hydroxyproline	Organic acids and derivatives	Carboxylic acids and derivatives
3-(2,5-Dimethoxyphenyl)propanoic acid	Phenylpropanoids and polyketides	Phenylpropanoic acids
Ganoderic acid F	Lipids and lipid-like molecules	Prenol lipids
2-Hydroxyhexadecanoic acid	Lipids and lipid-like molecules	Fatty Acyls
2-Hydroxyhexadecanoic acid	Lipids and lipid-like molecules	Fatty Acyls
2-Hydroxyhexadecanoic acid	Lipids and lipid-like molecules	Fatty Acyls
2-Hydroxyhexadecanoic acid	Lipids and lipid-like molecules	Fatty Acyls
2-Hydroxyhexadecanoic acid	Lipids and lipid-like molecules	Fatty Acyls
9S,10S,11R-trihydroxy-12Z-octadecenoic acid	Lipids and lipid-like molecules	Fatty Acyls
Myrsinone	Lipids and lipid-like molecules	Prenol lipids
Astragalin	Phenylpropanoids and polyketides	Flavonoids
Uvaricin	Lipids and lipid-like molecules	Fatty Acyls
Uvaricin	Lipids and lipid-like molecules	Fatty Acyls
3S,7S-dimethyl-tetradecan-2S-ol
Pyridine	Organoheterocyclic compounds	Pyridines and derivatives
Phenylalanyl-Isoleucine	Organic acids and derivatives	Carboxylic acids and derivatives
Oleoyl Ethyl Amide	Organic acids and derivatives	Carboximidic acids and derivatives
Gly Arg Lys	Organic acids and derivatives	Carboxylic acids and derivatives
Cinnamyl propionate	Benzenoids	Benzene and substituted derivatives
Mitoxantrone	Benzenoids	Anthracenes
Elatine	Lipids and lipid-like molecules	Prenol lipids
Muricatenol	Lipids and lipid-like molecules	Fatty Acyls
(Z)-5-Hexadecenoic acid	Lipids and lipid-like molecules	Fatty Acyls
(Z)-5-Hexadecenoic acid	Lipids and lipid-like molecules	Fatty Acyls
(Z)-5-Hexadecenoic acid	Lipids and lipid-like molecules	Fatty Acyls
Betaine	Organic acids and derivatives	Carboxylic acids and derivatives
Betaine	Organic acids and derivatives	Carboxylic acids and derivatives
Betaine	Organic acids and derivatives	Carboxylic acids and derivatives
Betaine	Organic acids and derivatives	Carboxylic acids and derivatives
Betaine	Organic acids and derivatives	Carboxylic acids and derivatives
Betaine	Organic acids and derivatives	Carboxylic acids and derivatives
Cibaric acid	Lipids and lipid-like molecules	Fatty Acyls
Cibaric acid	Lipids and lipid-like molecules	Fatty Acyls
2-Methylisoborneol	Lipids and lipid-like molecules	Prenol lipids
2-Methylisoborneol	Lipids and lipid-like molecules	Prenol lipids
2-Methylisoborneol	Lipids and lipid-like molecules	Prenol lipids
Butyl 4'-O-butanoyl-6-O-hexadecanoyl-neohesperidoside	Lipids and lipid-like molecules	Saccharolipids
N4-Acetylsulfadimidine	Benzenoids	Benzene and substituted derivatives
Ala Ile Val	Organic acids and derivatives	Carboxylic acids and derivatives
Furfuryl thioacetate	Organoheterocyclic compounds	Heteroaromatic compounds
Furfuryl thioacetate	Organoheterocyclic compounds	Heteroaromatic compounds
Furfuryl thioacetate	Organoheterocyclic compounds	Heteroaromatic compounds
Furfuryl thioacetate	Organoheterocyclic compounds	Heteroaromatic compounds
Furfuryl thioacetate	Organoheterocyclic compounds	Heteroaromatic compounds
Furfuryl thioacetate	Organoheterocyclic compounds	Heteroaromatic compounds
Furfuryl thioacetate	Organoheterocyclic compounds	Heteroaromatic compounds
Furfuryl thioacetate	Organoheterocyclic compounds	Heteroaromatic compounds
Furfuryl thioacetate	Organoheterocyclic compounds	Heteroaromatic compounds
Furfuryl thioacetate	Organoheterocyclic compounds	Heteroaromatic compounds
Furfuryl thioacetate	Organoheterocyclic compounds	Heteroaromatic compounds
Furfuryl thioacetate	Organoheterocyclic compounds	Heteroaromatic compounds
Furfuryl thioacetate	Organoheterocyclic compounds	Heteroaromatic compounds
Furfuryl thioacetate	Organoheterocyclic compounds	Heteroaromatic compounds
Furfuryl thioacetate	Organoheterocyclic compounds	Heteroaromatic compounds
19-hydroxy-nonadecanoic acid	Lipids and lipid-like molecules	Fatty Acyls
Hexadecan-3-one	Organic oxygen compounds	Organooxygen compounds
Hexadecan-3-one	Organic oxygen compounds	Organooxygen compounds
3,4,4-Trimethyl-1,2-cyclopentanedione	Organic oxygen compounds	Organooxygen compounds
4,8-Dimethyl-1,3(E),7-nonatriene	Lipids and lipid-like molecules	Prenol lipids
4,8-Dimethyl-1,3(E),7-nonatriene	Lipids and lipid-like molecules	Prenol lipids
4,8-Dimethyl-1,3(E),7-nonatriene	Lipids and lipid-like molecules	Prenol lipids
Cyromazine	Organoheterocyclic compounds	Triazines
DehydroIndapamide	Benzenoids	Benzene and substituted derivatives
Semilicoisoflavone B	Phenylpropanoids and polyketides	Isoflavonoids
AAPH	Organic nitrogen compounds	Organonitrogen compounds
Allyl benzoate	Benzenoids	Benzene and substituted derivatives
1,1-Dimethoxynonane	Organic oxygen compounds	Organooxygen compounds
Stearamide	Organic acids and derivatives	Carboximidic acids and derivatives
Stearamide	Organic acids and derivatives	Carboximidic acids and derivatives
Narciclasine	Organoheterocyclic compounds	Quinolines and derivatives
Traumatic Acid	Lipids and lipid-like molecules	Fatty Acyls
Traumatic Acid	Lipids and lipid-like molecules	Fatty Acyls
Oxyquinoline	Organoheterocyclic compounds	Quinolines and derivatives
N(alpha)-t-Butoxycarbonyl-L-leucine	Organic acids and derivatives	Carboxylic acids and derivatives
Gibberellin A98	Lipids and lipid-like molecules	Prenol lipids
Panaxydol linoleate	Lipids and lipid-like molecules	Fatty Acyls
Diisobutyl phthalate	Benzenoids	Benzene and substituted derivatives
Diisobutyl phthalate	Benzenoids	Benzene and substituted derivatives
Diisobutyl phthalate	Benzenoids	Benzene and substituted derivatives
Octadecyl fumarate	Lipids and lipid-like molecules	Fatty Acyls
9,10-dihydroxy-hexadecanoic acid	Lipids and lipid-like molecules	Fatty Acyls
9,10-dihydroxy-hexadecanoic acid	Lipids and lipid-like molecules	Fatty Acyls
9,10-dihydroxy-hexadecanoic acid	Lipids and lipid-like molecules	Fatty Acyls
9,10-dihydroxy-hexadecanoic acid	Lipids and lipid-like molecules	Fatty Acyls
9,10-dihydroxy-hexadecanoic acid	Lipids and lipid-like molecules	Fatty Acyls
9,10-dihydroxy-hexadecanoic acid	Lipids and lipid-like molecules	Fatty Acyls
9,10-dihydroxy-hexadecanoic acid	Lipids and lipid-like molecules	Fatty Acyls
S-Octyl GSH	Organic acids and derivatives	Carboxylic acids and derivatives
Ambrettolic acid	Lipids and lipid-like molecules	Fatty Acyls
Ambrettolic acid	Lipids and lipid-like molecules	Fatty Acyls
Ambrettolic acid	Lipids and lipid-like molecules	Fatty Acyls
Ambrettolic acid	Lipids and lipid-like molecules	Fatty Acyls
Machaerol C	Phenylpropanoids and polyketides	Isoflavonoids
Gingerglycolipid A	Lipids and lipid-like molecules	Glycerolipids
Auxin b	Lipids and lipid-like molecules	Prenol lipids
Torvoside F	Lipids and lipid-like molecules	Steroids and steroid derivatives
Dioctyl phthalate	Benzenoids	Benzene and substituted derivatives
Dioctyl phthalate	Benzenoids	Benzene and substituted derivatives
Dioctyl phthalate	Benzenoids	Benzene and substituted derivatives
1-(2-Pyrimidyl)piperazine	Organoheterocyclic compounds	Diazinanes
(1S,2S)-3-oxo-2-pentyl-cyclopentanehexanoic acid	Lipids and lipid-like molecules	Fatty Acyls
(1S,2S)-3-oxo-2-pentyl-cyclopentanehexanoic acid	Lipids and lipid-like molecules	Fatty Acyls
(1S,2S)-3-oxo-2-pentyl-cyclopentanehexanoic acid	Lipids and lipid-like molecules	Fatty Acyls
(1S,2S)-3-oxo-2-pentyl-cyclopentanehexanoic acid	Lipids and lipid-like molecules	Fatty Acyls
(1S,2S)-3-oxo-2-pentyl-cyclopentanehexanoic acid	Lipids and lipid-like molecules	Fatty Acyls
(1S,2S)-3-oxo-2-pentyl-cyclopentanehexanoic acid	Lipids and lipid-like molecules	Fatty Acyls
3-Hydroxydodecanoic acid	Organic acids and derivatives	Hydroxy acids and derivatives
FAPy-adenine	Organoheterocyclic compounds	Diazines
Suillusin	Organoheterocyclic compounds	Coumarans
Ethyl 2-furanacrylate	Lipids and lipid-like molecules	Fatty Acyls
Undecan-4-one	Organic oxygen compounds	Organooxygen compounds
N-(3S-hydroxydecanoyl)-L-serine	Organic acids and derivatives	Carboxylic acids and derivatives
(9R,10S,12Z)-9,10-Dihydroxy-8-oxo-12-octadecenoic acid	Lipids and lipid-like molecules	Fatty Acyls
3',4'-Methylenedioxy-alpha-pyrrolidinopropiophenone	Organoheterocyclic compounds	Benzodioxoles
6-Gingerol	Benzenoids	Phenols
9-Hydroxy-7-megastigmen-3-one glucoside	Lipids and lipid-like molecules	Fatty Acyls
Epiafzelechin Trimethyl Ether	Phenylpropanoids and polyketides	Flavonoids
Octan-3S-ol	Lipids and lipid-like molecules	Fatty Acyls
2-Methylpiperidine	Organoheterocyclic compounds	Piperidines
2-Methylpiperidine	Organoheterocyclic compounds	Piperidines
2-Methylpiperidine	Organoheterocyclic compounds	Piperidines
2-Methylpiperidine	Organoheterocyclic compounds	Piperidines
2-Methylpiperidine	Organoheterocyclic compounds	Piperidines
2-Methylpiperidine	Organoheterocyclic compounds	Piperidines
2-Methylpiperidine	Organoheterocyclic compounds	Piperidines
2-Methylpiperidine	Organoheterocyclic compounds	Piperidines
2-Methylpiperidine	Organoheterocyclic compounds	Piperidines
2-Methylpiperidine	Organoheterocyclic compounds	Piperidines
2-Methylpiperidine	Organoheterocyclic compounds	Piperidines
7-Hydroxyenterolactone	Lignans, neolignans and related compounds	Furanoid lignans
Quercetin 3-(2G-rhamnosylgentiobioside)	Phenylpropanoids and polyketides	Flavonoids
Pandaroside B	Lipids and lipid-like molecules	Steroids and steroid derivatives
Hexyl (R)-3-hydroxybutyrate
Oxitropium	Organic acids and derivatives	Hydroxy acids and derivatives
(x)-2-Heptanol glucoside	Lipids and lipid-like molecules	Fatty Acyls
(x)-2-Heptanol glucoside	Lipids and lipid-like molecules	Fatty Acyls
ICI 164384	Organic acids and derivatives	Carboxylic acids and derivatives
ICI 164384	Organic acids and derivatives	Carboxylic acids and derivatives
Choline	Organic nitrogen compounds	Organonitrogen compounds
Choline	Organic nitrogen compounds	Organonitrogen compounds
Choline	Organic nitrogen compounds	Organonitrogen compounds
Choline	Organic nitrogen compounds	Organonitrogen compounds
Choline	Organic nitrogen compounds	Organonitrogen compounds
Choline	Organic nitrogen compounds	Organonitrogen compounds
Choline	Organic nitrogen compounds	Organonitrogen compounds
4-(Methylnitrosamino)-1-(3-pyridyl)-1-butanol	Organoheterocyclic compounds	Pyridines and derivatives
Diprenorphine	Benzenoids	Phenanthrenes and derivatives
Adenosine	Nucleosides, nucleotides, and analogues	Purine nucleosides
S-Methyl-1-thio-D-glycerate	Organic oxygen compounds	Organooxygen compounds
Stearoylethanolamide	Organic nitrogen compounds	Organonitrogen compounds
2',3',5'-triacetyl-5-Azacytidine	Organic oxygen compounds	Organooxygen compounds
4,4-Difluoropregn-5-ene-3,20-dione	Lipids and lipid-like molecules	Steroids and steroid derivatives
Isoquercitrin	Phenylpropanoids and polyketides	Flavonoids
Anabsin	Lipids and lipid-like molecules	Prenol lipids
Linoleic acid	Lipids and lipid-like molecules	Fatty Acyls
Linoleic acid	Lipids and lipid-like molecules	Fatty Acyls
Linoleic acid	Lipids and lipid-like molecules	Fatty Acyls
Linoleic acid	Lipids and lipid-like molecules	Fatty Acyls
Linoleic acid	Lipids and lipid-like molecules	Fatty Acyls
Trospium	Benzenoids	Benzene and substituted derivatives
Cyclohexylammonium	Organic nitrogen compounds	Organonitrogen compounds
Cyclohexylammonium	Organic nitrogen compounds	Organonitrogen compounds
Cyclohexylammonium	Organic nitrogen compounds	Organonitrogen compounds
Cyclohexylammonium	Organic nitrogen compounds	Organonitrogen compounds
Cyclohexylammonium	Organic nitrogen compounds	Organonitrogen compounds
Cyclohexylammonium	Organic nitrogen compounds	Organonitrogen compounds
Cyclohexylammonium	Organic nitrogen compounds	Organonitrogen compounds
Cyclohexylammonium	Organic nitrogen compounds	Organonitrogen compounds
Cyclohexylammonium	Organic nitrogen compounds	Organonitrogen compounds
Cyclohexylammonium	Organic nitrogen compounds	Organonitrogen compounds
Cyclohexylammonium	Organic nitrogen compounds	Organonitrogen compounds
Cyclohexylammonium	Organic nitrogen compounds	Organonitrogen compounds
Cyclohexylammonium	Organic nitrogen compounds	Organonitrogen compounds
Cyclohexylammonium	Organic nitrogen compounds	Organonitrogen compounds
Cyclohexylammonium	Organic nitrogen compounds	Organonitrogen compounds
2-amino-8-oxo-9,10-epoxy-decanoic acid	Organic acids and derivatives	Carboxylic acids and derivatives
Neomycin C	Organic oxygen compounds	Organooxygen compounds
cis-7-Hexadecenoic Acid	Lipids and lipid-like molecules	Fatty Acyls
8-Oxodeoxycoformycin	Organoheterocyclic compounds	Imidazodiazepines
Quercetin 3-sambubioside-3'-glucoside	Phenylpropanoids and polyketides	Flavonoids
Val Ile	Organic acids and derivatives	Carboxylic acids and derivatives
3-Oxovalproic acid	Organic acids and derivatives	Keto acids and derivatives
2-amino-14,16-dimethyloctadecan-3-ol	Organic nitrogen compounds	Organonitrogen compounds
2-amino-14,16-dimethyloctadecan-3-ol	Organic nitrogen compounds	Organonitrogen compounds
1-Methylpiperazine	Organoheterocyclic compounds	Diazinanes
1-Methylpiperazine	Organoheterocyclic compounds	Diazinanes
Chlormephos	Organic acids and derivatives	Organic dithiophosphoric acids and derivatives
1-Monopalmitin	Lipids and lipid-like molecules	Glycerolipids
1-Monopalmitin	Lipids and lipid-like molecules	Glycerolipids
DL-Tryptophan	Organoheterocyclic compounds	Indoles and derivatives
L-Tryptophan	Organoheterocyclic compounds	Indoles and derivatives
cadralazine	Organic nitrogen compounds	Organonitrogen compounds
Docosahexaenoyl PAF C-16	Lipids and lipid-like molecules	Glycerophospholipids
Docosahexaenoyl PAF C-16	Lipids and lipid-like molecules	Glycerophospholipids
gamma-tocopherol	Lipids and lipid-like molecules	Prenol lipids
14,14,14-Trifluoro-11Z-tetradecenyl acetate	Organic acids and derivatives	Carboxylic acids and derivatives
14,14,14-Trifluoro-11Z-tetradecenyl acetate	Organic acids and derivatives	Carboxylic acids and derivatives
14,14,14-Trifluoro-11Z-tetradecenyl acetate	Organic acids and derivatives	Carboxylic acids and derivatives
14,14,14-Trifluoro-11Z-tetradecenyl acetate	Organic acids and derivatives	Carboxylic acids and derivatives
14,14,14-Trifluoro-11Z-tetradecenyl acetate	Organic acids and derivatives	Carboxylic acids and derivatives
14,14,14-Trifluoro-11Z-tetradecenyl acetate	Organic acids and derivatives	Carboxylic acids and derivatives
14,14,14-Trifluoro-11Z-tetradecenyl acetate	Organic acids and derivatives	Carboxylic acids and derivatives
14,14,14-Trifluoro-11Z-tetradecenyl acetate	Organic acids and derivatives	Carboxylic acids and derivatives
Lysine-containing siolipin	Organic acids and derivatives	Carboxylic acids and derivatives
Quercetin 3-beta-laminaribioside	Phenylpropanoids and polyketides	Flavonoids
Dihydrocapsiate	Benzenoids	Phenols
Dihydrocapsiate	Benzenoids	Phenols
Dihydrocapsiate	Benzenoids	Phenols
Dihydrocapsiate	Benzenoids	Phenols
Dihydrocapsiate	Benzenoids	Phenols
Isoferuloyl C1-glucuronide	Phenylpropanoids and polyketides	Cinnamic acids and derivatives
N-methylundec-10-enamide	Lipids and lipid-like molecules	Fatty Acyls
3-Methylbutyl 2-furanbutanoate	Lipids and lipid-like molecules	Fatty Acyls
8-HpODE	Lipids and lipid-like molecules	Fatty Acyls
8-HpODE	Lipids and lipid-like molecules	Fatty Acyls
S-(N-Hydroxy-N-methylcarbamoyl)glutathione	Organic acids and derivatives	Carboxylic acids and derivatives
C16:2n-6,8	Lipids and lipid-like molecules	Fatty Acyls
C16:2n-6,8	Lipids and lipid-like molecules	Fatty Acyls
C16:2n-6,8	Lipids and lipid-like molecules	Fatty Acyls
C16:2n-6,8	Lipids and lipid-like molecules	Fatty Acyls
C16:2n-6,8	Lipids and lipid-like molecules	Fatty Acyls
C16:2n-6,8	Lipids and lipid-like molecules	Fatty Acyls
C16:2n-6,8	Lipids and lipid-like molecules	Fatty Acyls
C16:2n-6,8	Lipids and lipid-like molecules	Fatty Acyls
C16:2n-6,8	Lipids and lipid-like molecules	Fatty Acyls
C16:2n-6,8	Lipids and lipid-like molecules	Fatty Acyls
C16:2n-6,8	Lipids and lipid-like molecules	Fatty Acyls
Guazatine	Organic nitrogen compounds	Organonitrogen compounds
Kanzonol R	Phenylpropanoids and polyketides	Isoflavonoids
5-Chloro-1,2,4-trihydroxybenzene	Benzenoids	Phenols
5-Chloro-1,2,4-trihydroxybenzene	Benzenoids	Phenols
5-Chloro-1,2,4-trihydroxybenzene	Benzenoids	Phenols
5-Chloro-1,2,4-trihydroxybenzene	Benzenoids	Phenols
5-Chloro-1,2,4-trihydroxybenzene	Benzenoids	Phenols
3-Hydroxynonyl acetate	Lipids and lipid-like molecules	Fatty Acyls
Poloxalene	Organoheterocyclic compounds	Epoxides
Poloxalene	Organoheterocyclic compounds	Epoxides
Kanzonol I	Phenylpropanoids and polyketides	Isoflavonoids
9-hydroperoxy-10E,12,15Z-octadecatrienoic acid	Lipids and lipid-like molecules	Fatty Acyls
9-hydroperoxy-10E,12,15Z-octadecatrienoic acid	Lipids and lipid-like molecules	Fatty Acyls
Crocin 3	Lipids and lipid-like molecules	Prenol lipids
Crocin 3	Lipids and lipid-like molecules	Prenol lipids
Ganoderic acid eta	Lipids and lipid-like molecules	Prenol lipids
IDFP	Organic acids and derivatives	Organic phosphonic acids and derivatives
Rinderine	Alkaloids and derivatives
Rinderine	Alkaloids and derivatives
Rinderine	Alkaloids and derivatives
Thioxolone	Benzenoids	Phenols
Montanin	Lipids and lipid-like molecules	Prenol lipids
18-Oxooleate	Lipids and lipid-like molecules	Fatty Acyls
Neoannonin B	Lipids and lipid-like molecules	Fatty Acyls
trans-Hexadec-2-enoyl carnitine	Lipids and lipid-like molecules	Fatty Acyls
5-Dodecyldihydro-2(3H)-furanone	Organoheterocyclic compounds	Lactones
5-Dodecyldihydro-2(3H)-furanone	Organoheterocyclic compounds	Lactones
5-Dodecyldihydro-2(3H)-furanone	Organoheterocyclic compounds	Lactones
5-Dodecyldihydro-2(3H)-furanone	Organoheterocyclic compounds	Lactones
5-Dodecyldihydro-2(3H)-furanone	Organoheterocyclic compounds	Lactones
O-Geranylvanillin	Lipids and lipid-like molecules	Prenol lipids
C-12 NBD-dihydro-Ceramide	Lipids and lipid-like molecules	Sphingolipids
11,12,15-trihydroxy palmitic acid	Lipids and lipid-like molecules	Fatty Acyls
Isoscopoletin	Phenylpropanoids and polyketides	Coumarins and derivatives
(3S,7E,9S)-9-Hydroxy-4,7-megastigmadien-3-one 9-glucoside	Lipids and lipid-like molecules	Fatty Acyls
N-Undecylbenzenesulfonic acid	Benzenoids	Benzene and substituted derivatives
Hericene B	Lipids and lipid-like molecules	Prenol lipids
Yuccaol C	Phenylpropanoids and polyketides	2-arylbenzofuran flavonoids
Yuccaol C	Phenylpropanoids and polyketides	2-arylbenzofuran flavonoids
Miglustat	Organoheterocyclic compounds	Piperidines
Pyriminobac-methyl	Organic oxygen compounds	Organooxygen compounds
(23S)-23,25-dihdroxy-24-oxovitamine D3 23-(beta-glucuronide)	Lipids and lipid-like molecules	Steroids and steroid derivatives
Bopindolol	Benzenoids	Benzene and substituted derivatives
Setarin	Phenylpropanoids and polyketides	Coumarins and derivatives
Altretamine	Organic nitrogen compounds	Organonitrogen compounds
Vaccenic acid	Lipids and lipid-like molecules	Fatty Acyls
(11Z)-8,18-methano-retinal	Lipids and lipid-like molecules	Prenol lipids
Malyngamide J	Organic oxygen compounds	Organooxygen compounds
Cannabinol	Organoheterocyclic compounds	Benzopyrans
N-(5-Methyl-3-oxohexyl)alanine	Organic acids and derivatives	Carboxylic acids and derivatives
N-(5-Methyl-3-oxohexyl)alanine	Organic acids and derivatives	Carboxylic acids and derivatives
N-(5-Methyl-3-oxohexyl)alanine	Organic acids and derivatives	Carboxylic acids and derivatives
N-(5-Methyl-3-oxohexyl)alanine	Organic acids and derivatives	Carboxylic acids and derivatives
N-(5-Methyl-3-oxohexyl)alanine	Organic acids and derivatives	Carboxylic acids and derivatives
N-(5-Methyl-3-oxohexyl)alanine	Organic acids and derivatives	Carboxylic acids and derivatives
N-(5-Methyl-3-oxohexyl)alanine	Organic acids and derivatives	Carboxylic acids and derivatives
N-(5-Methyl-3-oxohexyl)alanine	Organic acids and derivatives	Carboxylic acids and derivatives
N-(5-Methyl-3-oxohexyl)alanine	Organic acids and derivatives	Carboxylic acids and derivatives
N-(5-Methyl-3-oxohexyl)alanine	Organic acids and derivatives	Carboxylic acids and derivatives
1,2,3,4,tetrahydro-1,5,7-trimethylnapthalene	Benzenoids	Tetralins
1-Hexadecen-3-one	Organic oxygen compounds	Organooxygen compounds
3-Ethenyl-2,5-dimethyl-4-oxohex-5-en-2-yl acetate	Organic oxygen compounds	Organooxygen compounds
Nordihydrocapsaicin	Benzenoids	Phenols
R-Palmitoyl-(2-methyl) Ethanolamide	Lipids and lipid-like molecules	Fatty Acyls
N-(14-Methylhexadecanoyl)pyrrolidine	Organoheterocyclic compounds	Pyrrolidines
Methotrimeprazine	Organoheterocyclic compounds	Benzothiazines
1,1-Dihexyloxyethane	Organic oxygen compounds	Organooxygen compounds
15-oxo-hexadecanoic acid	Lipids and lipid-like molecules	Fatty Acyls
15-oxo-hexadecanoic acid	Lipids and lipid-like molecules	Fatty Acyls
15-oxo-hexadecanoic acid	Lipids and lipid-like molecules	Fatty Acyls
15-oxo-hexadecanoic acid	Lipids and lipid-like molecules	Fatty Acyls
15-oxo-hexadecanoic acid	Lipids and lipid-like molecules	Fatty Acyls
15-oxo-hexadecanoic acid	Lipids and lipid-like molecules	Fatty Acyls
15-oxo-hexadecanoic acid	Lipids and lipid-like molecules	Fatty Acyls
15-oxo-hexadecanoic acid	Lipids and lipid-like molecules	Fatty Acyls
Eucalyptol	Organoheterocyclic compounds	Oxanes
Chondrosine	Lipids and lipid-like molecules	Fatty Acyls
N-Nitrosopyrrolidine	Organoheterocyclic compounds	Pyrrolidines
N-Nitrosopyrrolidine	Organoheterocyclic compounds	Pyrrolidines
2,2-dichloro-docosane-1,14-disulfate	Organic acids and derivatives	Organic sulfuric acids and derivatives
Epigallocatechin 3-O-(3-O-methylgallate)	Phenylpropanoids and polyketides	Flavonoids
6-Hydroxyindole	Organoheterocyclic compounds	Indoles and derivatives
Aesculin	Phenylpropanoids and polyketides	Coumarins and derivatives
5alpha-Cholestane	Lipids and lipid-like molecules	Steroids and steroid derivatives
17beta-Pyrazol-3-ylandrost-5-en-3beta-ol	Lipids and lipid-like molecules	Steroids and steroid derivatives
Triphenyl phosphate	Organic acids and derivatives	Organic phosphoric acids and derivatives
Aminofluoropropionic acid	Organic acids and derivatives	Carboxylic acids and derivatives
1,2-Diethylhydrazine	Organic nitrogen compounds	Organonitrogen compounds
1,2-Diethylhydrazine	Organic nitrogen compounds	Organonitrogen compounds
1,2-Diethylhydrazine	Organic nitrogen compounds	Organonitrogen compounds
1,2-Diethylhydrazine	Organic nitrogen compounds	Organonitrogen compounds
Methylpicraquassioside A	Organic oxygen compounds	Organooxygen compounds
Diacetylaminoazotoluene	Organoheterocyclic compounds	Azobenzenes
2,2-Dimethyl-3,4-bis(4-methoxyphenyl)-2H-1-benzopyran-7-ol acetate	Phenylpropanoids and polyketides	Isoflavonoids
2-Octaprenyl-6-hydroxyphenol	Lipids and lipid-like molecules	Prenol lipids
Kaempferol-7-o-glucoside	Phenylpropanoids and polyketides	Flavonoids
Spisulosine	Organic nitrogen compounds	Organonitrogen compounds
13-Deoxytedanolide	Phenylpropanoids and polyketides	Macrolides and analogues
3-hexanoyl-NBD Cholesterol	Lipids and lipid-like molecules	Steroids and steroid derivatives
3-hexanoyl-NBD Cholesterol	Lipids and lipid-like molecules	Steroids and steroid derivatives
3-hexanoyl-NBD Cholesterol	Lipids and lipid-like molecules	Steroids and steroid derivatives
IWR-1-endo	Benzenoids	Benzene and substituted derivatives
Capsiate	Benzenoids	Phenols
Capsiate	Benzenoids	Phenols
Capsiate	Benzenoids	Phenols
Minoxidil	Organic nitrogen compounds	Organonitrogen compounds
Diamidafos	Benzenoids	Benzene and substituted derivatives
C16 Sphinganine	Organic nitrogen compounds	Organonitrogen compounds
C16 Sphinganine	Organic nitrogen compounds	Organonitrogen compounds
Luteolin 6-C-glucoside 8-C-arabinoside	Phenylpropanoids and polyketides	Flavonoids
N-tetradecanoyl-L-Homoserine lactone	Organic acids and derivatives	Carboxylic acids and derivatives
Oleic acid(d2)	Lipids and lipid-like molecules	Fatty Acyls
Sudachiin A	Phenylpropanoids and polyketides	Flavonoids
Ala Ile	Organic acids and derivatives	Carboxylic acids and derivatives
R-138727	Benzenoids	Benzene and substituted derivatives
Ximelagatran	Organic acids and derivatives	Carboxylic acids and derivatives
(9Z,11E,13E,15Z)-4-Oxo-9,11,13,15-octadecatetraenoic acid	Lipids and lipid-like molecules	Fatty Acyls
(9Z,11E,13E,15Z)-4-Oxo-9,11,13,15-octadecatetraenoic acid	Lipids and lipid-like molecules	Fatty Acyls
(9Z,11E,13E,15Z)-4-Oxo-9,11,13,15-octadecatetraenoic acid	Lipids and lipid-like molecules	Fatty Acyls
(9Z,11E,13E,15Z)-4-Oxo-9,11,13,15-octadecatetraenoic acid	Lipids and lipid-like molecules	Fatty Acyls
Deamino-α-keto-demethylphosphinothricin
2-Methoxymethcathinone
Mebeverine metabolite (Veratric acid glucuronide)
N-(1-Deoxy-1-fructosyl)tryptophan
Pro His Asn
N-Butyl-1H-pyrazolo[3,4-d]pyrimidin-4-amine	Organoheterocyclic compounds	Pyrazolopyrimidines
Arg Ser Asn	Organic acids and derivatives	Carboxylic acids and derivatives
Ketoconazole Metabolite (1-Piperazinecarboxaldehyde, 4-[4-[[2-(2,4-dichlorophenyl)-2-(1H-imidazol-1-
N-Butyl-1H-pyrazolo[3,4-d]pyrimidin-4-amine	Organoheterocyclic compounds	Pyrazolopyrimidines
Arg Gly Leu	Organic acids and derivatives	Carboxylic acids and derivatives
2,7-Diethyl-1,6-dioxaspiro[4.4]nonane	Organic oxygen compounds	Organooxygen compounds
Tyr Arg Asp	Organic acids and derivatives	Carboxylic acids and derivatives
1,8-Naphthyridine-3-carboxylic acid, 1-ethyl-1,4-dihydro-7-hydroxy-4-oxo-
1α-hydroxy-23-[3-(1-hydroxy-1-methylethyl)phenyl]-22,22,23,23-tetradehydro-24,25,26,27-tetranorvitamin D3 / 1α-hydroxy-23-[3-(1-hydroxy-1-methylethyl)phenyl]-22,22,23,23-tetradehydro-24,25,26,27-tetranorcholecalciferol
N-Butyl-1H-pyrazolo[3,4-d]pyrimidin-4-amine	Organoheterocyclic compounds	Pyrazolopyrimidines
(6S)-vitamin D2 6,19-sulfur dioxide adduct / (6S)-ergocalciferol 6,19-sulfur dioxide adduct
N-[(Ethoxycarbonyl)methyl)-p-menthane-3-carboxamide	Organic acids and derivatives	Carboxylic acids and derivatives
N-Butyl-1H-pyrazolo[3,4-d]pyrimidin-4-amine	Organoheterocyclic compounds	Pyrazolopyrimidines
PC(14:0/14:0)	Lipids and lipid-like molecules	Glycerophospholipids
GlcCer(d16:2(4E,6E)/22:0(2OH))	Lipids and lipid-like molecules	Fatty Acyls
Val Arg Pro	Organic acids and derivatives	Carboxylic acids and derivatives
Debromoaplysiatoxin	Phenylpropanoids and polyketides	Macrolides and analogues
Sesamolinol 4'-O-b-D-glucosyl (1->6)-O-b-D-glucoside	Organic oxygen compounds	Organooxygen compounds
Diasarone 2	Benzenoids	Indanes
N-Butyl-1H-pyrazolo[3,4-d]pyrimidin-4-amine	Organoheterocyclic compounds	Pyrazolopyrimidines
[7]-Paradol	Benzenoids	Phenols
S-4-benzyl-3-((S)-3-hydroxy-2,2-dimethyloctanoyl)-5,5-dimethyloxazolidin-2-one	Organoheterocyclic compounds	Azolidines
PC(O-6:0/0:0)[U]
(10S)-Juvenile hormone III diol
(6S)-vitamin D2 6,19-sulfur dioxide adduct / (6S)-ergocalciferol 6,19-sulfur dioxide adduct
Triethyl citrate	Organic acids and derivatives	Carboxylic acids and derivatives
8-Methyl-2-propyl-1,7-dioxaspiro[5.5]undecane	Organic oxygen compounds	Organooxygen compounds
(+)-6-Methyl caprylic acid	Lipids and lipid-like molecules	Fatty Acyls
8-Methyl-2-propyl-1,7-dioxaspiro[5.5]undecane	Organic oxygen compounds	Organooxygen compounds
Gln Phe Met
Panaquinquecol 7	Lipids and lipid-like molecules	Fatty Acyls
Cys Lys Thr
L-Glutamic acid dibutyl ester	Organic acids and derivatives	Carboxylic acids and derivatives
(10S)-Juvenile hormone III diol
3-[[5-Methyl-2-(1-methylethyl)cyclohexyl]oxy]-1,2-propanediol	Lipids and lipid-like molecules	Prenol lipids
Asp Phe Trp	Organic acids and derivatives	Carboxylic acids and derivatives
Met Met Arg	Organic acids and derivatives	Carboxylic acids and derivatives
(±)12,13-DiHOME	Lipids and lipid-like molecules	Fatty Acyls
Ser Arg Gly	Organic acids and derivatives	Carboxylic acids and derivatives
PI(P-16:0/0:0)	Lipids and lipid-like molecules	Glycerophospholipids
(±)-CP 47,497-d11	Benzenoids	Benzene and substituted derivatives
Prostaglandin B2-d4	Lipids and lipid-like molecules	Fatty Acyls
1-Palmitoyllysophosphatidylcholine
PI(18:3(9Z,12Z,15Z)/0:0)	Lipids and lipid-like molecules	Glycerophospholipids
L-Glutamic acid dibutyl ester	Organic acids and derivatives	Carboxylic acids and derivatives
Physalin O	Lipids and lipid-like molecules	Steroids and steroid derivatives
1-Palmitoyllysophosphatidylcholine
PE(18:1(9Z)/0:0)	Lipids and lipid-like molecules	Glycerophospholipids
PC(6:2(3E,5E)/14:2(11E,13E))	Lipids and lipid-like molecules	Glycerophospholipids
Epicatechin-(2beta->5,4beta->6)-ent-epicatechin	Phenylpropanoids and polyketides	Flavonoids
1,2,3,4-Tetrahydro-1-[1-hydroxy-3-(4-hydroxyphenyl)-2-propenyl]-7-methoxy-2,6-naphthalenediol	Benzenoids	Tetralins
MG(16:0/0:0/0:0)[rac]	Lipids and lipid-like molecules	Glycerolipids
(22E)-26,26,26,27,27,27-hexafluoro-25-hydroxy-22,23-didehydrovitamin D3 / (22E)-26,26,26,27,27,27-hexafluoro-25-hydroxy-22,23-didehydrocholecalciferol	Lipids and lipid-like molecules	Steroids and steroid derivatives
MG(18:2(9Z,12Z)/0:0/0:0)[rac]	Lipids and lipid-like molecules	Fatty Acyls
Cys Trp Asp
Phe4Cl-TyrMe-OH
Nebramycin factor 4	Organic oxygen compounds	Organooxygen compounds
Trp Pro Leu	Organic acids and derivatives	Carboxylic acids and derivatives
MG(18:1(9Z)/0:0/0:0)[rac]	Lipids and lipid-like molecules	Glycerolipids
MG(18:1(9Z)/0:0/0:0)[rac]	Lipids and lipid-like molecules	Glycerolipids
ZM 447439	Benzenoids	Benzene and substituted derivatives
A 80987	Organic acids and derivatives	Carboxylic acids and derivatives
MG(0:0/18:0/0:0)	Lipids and lipid-like molecules	Glycerolipids
Oleic Acid	Lipids and lipid-like molecules	Fatty Acyls
PC(O-16:0/0:0)[U]
PC(14:1(9Z)/14:1(9Z))	Lipids and lipid-like molecules	Glycerophospholipids
soladulcidine	Lipids and lipid-like molecules	Steroids and steroid derivatives
12β-Hydroxy-3-oxo-5β-cholan-24-oic Acid
Prostaglandin F2α-biotin
PC(22:2(13Z,16Z)/15:1(9Z))	Lipids and lipid-like molecules	Glycerophospholipids
PC(O-8:0/O-16:0)[U]
PC(O-15:0/20:4(5Z,8Z,11Z,14Z))[U]
SM(d18:2/18:1)	Organic nitrogen compounds	Organonitrogen compounds
DG(18:4(6Z,9Z,12Z,15Z)/22:3(10Z,13Z,16Z)/0:0)[iso2]	Lipids and lipid-like molecules	Glycerolipids
5β-Cholestane-3α,7α-diol
PG(14:1(9Z)/14:1(9Z))	Lipids and lipid-like molecules	Glycerophospholipids
PC(O-8:0/O-16:0)[U]
DG(14:0/17:0/0:0)[iso2]	Lipids and lipid-like molecules	Glycerolipids
PS(15:0/16:0)
PG(P-18:0/18:2(9Z,12Z))
DG(20:5(5Z,8Z,11Z,14Z,17Z)/22:5(7Z,10Z,13Z,16Z,19Z)/0:0)[iso2]	Lipids and lipid-like molecules	Glycerolipids
DG(12:0/22:3(10Z,13Z,16Z)/0:0)[iso2]	Lipids and lipid-like molecules	Glycerolipids
Vitamin E succinate(tocopherol succinate)	Lipids and lipid-like molecules	Prenol lipids
PI(O-16:0/18:0)	Lipids and lipid-like molecules	Glycerophospholipids
PE-Cer(d16:2(4E,6E)/18:0(2OH))	Organic acids and derivatives	Organic phosphoric acids and derivatives
DG(15:1(9Z)/18:1(9Z)/0:0)[iso2]	Lipids and lipid-like molecules	Glycerolipids
DG(15:1(9Z)/19:0/0:0)[iso2]	Lipids and lipid-like molecules	Glycerolipids
PS(13:0/20:0)	Lipids and lipid-like molecules	Glycerophospholipids
1,2-dipalmitoyl-sn-glycero-3-phosphoethanolamine-N-(succinyl)	Lipids and lipid-like molecules	Glycerophospholipids
DG(15:1(9Z)/19:0/0:0)[iso2]	Lipids and lipid-like molecules	Glycerolipids
DG(15:1(9Z)/18:0/0:0)[iso2]	Lipids and lipid-like molecules	Glycerolipids
DG(15:1(9Z)/19:0/0:0)[iso2]	Lipids and lipid-like molecules	Glycerolipids
PI(22:0/21:0)	Lipids and lipid-like molecules	Glycerophospholipids
PI(22:0/21:0)	Lipids and lipid-like molecules	Glycerophospholipids
PS(14:0/22:0)
Hydroxy Linoleins
GlcCer(d14:2(4E,6E)/16:0)	Lipids and lipid-like molecules	Fatty Acyls
2,3,2',3'-Tetrakis(3-hydroxytetradecanoyl)-D-glucosaminyl-1,6-β- D-glucosamine 1-phosphate
LBPA(16:0/18:1(9Z))	Lipids and lipid-like molecules	Glycerophospholipids
2,3,2',3'-Tetrakis(3-hydroxytetradecanoyl)-D-glucosaminyl-1,6-β- D-glucosamine 1-phosphate
PG(20:3(8Z,11Z,14Z)/14:0)	Lipids and lipid-like molecules	Glycerophospholipids
LBPA(16:0/18:1(9Z))	Lipids and lipid-like molecules	Glycerophospholipids
DG(12:0/22:2(13Z,16Z)/0:0)[iso2]	Lipids and lipid-like molecules	Glycerolipids
PA(O-16:0/16:0)
Spectinomycin adenylate
Patulin	Organoheterocyclic compounds	Pyrans
Oleic Acid	Lipids and lipid-like molecules	Fatty Acyls
(-)-11-hydroxy-9,10-dihydrojasmonic acid	Lipids and lipid-like molecules	Fatty Acyls
Theophylline	Organoheterocyclic compounds	Imidazopyrimidines
Glycerol tripropanoate	Lipids and lipid-like molecules	Glycerolipids
Hydrastinine	Organoheterocyclic compounds	Tetrahydroisoquinolines
Ripazepam	Benzenoids	Benzene and substituted derivatives
9,10-DiHOME(12)	Lipids and lipid-like molecules	Fatty Acyls
9,10-DiHOME(12)	Lipids and lipid-like molecules	Fatty Acyls
5-Butyltetrahydro-2-oxo-3-furancarboxylic acid	Organoheterocyclic compounds	Lactones
2-Hydroxyisophthalic acid	Benzenoids	Benzene and substituted derivatives
1-O-Galloylfructose	Benzenoids	Benzene and substituted derivatives
2-Dodecylbenzenesulfonic acid	Benzenoids	Benzene and substituted derivatives
PHOP	Organoheterocyclic compounds	Oxazolopyridines
Estradiol disulfate	Lipids and lipid-like molecules	Steroids and steroid derivatives
(R)-2-Amino-N-(2,2,4,4-tetramethyl-3-thietanyl)propanamide	Organoheterocyclic compounds	Thietanes
Sodium Tetradecyl Sulfate	Organic acids and derivatives	Organic sulfuric acids and derivatives
Triethylene glycol diglycidyl ether	Organoheterocyclic compounds	Epoxides
N-Undecylbenzenesulfonic acid	Benzenoids	Benzene and substituted derivatives
Heptanoic acid, 6-hydroxy-, (R)-	Organic acids and derivatives	Hydroxy acids and derivatives
R-2-Hydroxy-3-methylbutanoic acid 3-Methylbutanoyl	Lipids and lipid-like molecules	Fatty Acyls
L-Olivosyl-oleandolide	Phenylpropanoids and polyketides	Macrolides and analogues
Geranyl acetoacetate	Lipids and lipid-like molecules	Fatty Acyls
N-Benzoyl-D-arginine	Benzenoids	Benzene and substituted derivatives
(E)-2-Methyl-2-buten-1-ol O-beta-D-Glucopyranoside	Lipids and lipid-like molecules	Fatty Acyls
16-hydroperoxy-9Z,12,14E-octadecatrienoic acid	Lipids and lipid-like molecules	Fatty Acyls
Glu Asp Arg	Organic acids and derivatives	Carboxylic acids and derivatives
5-hydroxysebacate	Organic acids and derivatives	Hydroxy acids and derivatives
Caffeic Acid	Phenylpropanoids and polyketides	Cinnamic acids and derivatives
Ethyl isopropyl disulfide	Organosulfur compounds	Organic disulfides
Hydroxytyrosol 1-O-glucoside	Organic oxygen compounds	Organooxygen compounds
phorbol 13-acetate 12-myristate	Lipids and lipid-like molecules	Prenol lipids
Dibutyl malate	Organic acids and derivatives	Hydroxy acids and derivatives
Dibutyl malate	Organic acids and derivatives	Hydroxy acids and derivatives
Quercetin 3-galactoside	Phenylpropanoids and polyketides	Flavonoids
3,3'-Thiobispropanoic acid	Organic acids and derivatives	Carboxylic acids and derivatives
Dicyclohexyl disulfide	Organosulfur compounds	Organic disulfides
13-sophorosyloxydocosanoic acid	Lipids and lipid-like molecules	Fatty Acyls
n-butyrl n-valeric acid	Organic acids and derivatives	Keto acids and derivatives
Quinacridone	Organoheterocyclic compounds	Quinolines and derivatives
9(R)-HODE	Lipids and lipid-like molecules	Fatty Acyls
9(R)-HODE	Lipids and lipid-like molecules	Fatty Acyls
Gingerol	Benzenoids	Phenols
Dipropyl hexanedioate	Lipids and lipid-like molecules	Fatty Acyls
4-keto stearic acid	Lipids and lipid-like molecules	Fatty Acyls
3-Pyrimidin-2-yl-2-pyrimidin-2-ylmethyl-Propionic Acid	Organoheterocyclic compounds	Diazines
Laudanine	Organoheterocyclic compounds	Isoquinolines and derivatives
Granisetron	Organoheterocyclic compounds	Benzopyrazoles
9,12,13-TriHOME(10)	Lipids and lipid-like molecules	Fatty Acyls
9,12,13-TriHOME(10)	Lipids and lipid-like molecules	Fatty Acyls
9,12,13-TriHOME(10)	Lipids and lipid-like molecules	Fatty Acyls
9,12,13-TriHOME(10)	Lipids and lipid-like molecules	Fatty Acyls
Dimethisterone	Lipids and lipid-like molecules	Steroids and steroid derivatives
Squamosinin A	Lipids and lipid-like molecules	Fatty Acyls
Cibaric acid	Lipids and lipid-like molecules	Fatty Acyls
6,8-Di-C-alpha-L-arabinopyranosylapigenin	Phenylpropanoids and polyketides	Flavonoids
4-Hydroxyphenylglyoxylate	Benzenoids	Benzene and substituted derivatives
Ridentin	Lipids and lipid-like molecules	Prenol lipids
13(S)-HOTrE	Lipids and lipid-like molecules	Fatty Acyls
12-oxo-dodecanoic acid	Lipids and lipid-like molecules	Fatty Acyls
9S,10S,11R-trihydroxy-12Z,15Z-octadecadienoic acid	Lipids and lipid-like molecules	Fatty Acyls
9S,10S,11R-trihydroxy-12Z,15Z-octadecadienoic acid	Lipids and lipid-like molecules	Fatty Acyls
Succinic acid	Organic acids and derivatives	Carboxylic acids and derivatives
3-capryl propionic acid	Organic acids and derivatives	Keto acids and derivatives
2-Methyladipic acid	Lipids and lipid-like molecules	Fatty Acyls
2-Hexyldecanoic acid	Lipids and lipid-like molecules	Fatty Acyls
9(Z),11(E)-Conjugated Linoleic Acid	Lipids and lipid-like molecules	Fatty Acyls
(1S,2S,4S)-1,8-Epoxy-p-menthane-2,7-diol 2-O-b-D-glucoside	Organic oxygen compounds	Organooxygen compounds
5,7,4'-Trihydroxy-6,3',5'-trimethoxyisoflavone 7-O-glucoside	Phenylpropanoids and polyketides	Isoflavonoids
Rutin	Phenylpropanoids and polyketides	Flavonoids
Uplandicine	Alkaloids and derivatives
3-Methyl valeric acid	Lipids and lipid-like molecules	Fatty Acyls
3,4-Dihydroxybenzaldehyde	Organic oxygen compounds	Organooxygen compounds
4-Pyridoxic acid	Organoheterocyclic compounds	Pyridines and derivatives
13(R)-HODE	Lipids and lipid-like molecules	Fatty Acyls
3,7-Dimethyluric acid	Organoheterocyclic compounds	Imidazopyrimidines
2,2'-(3-methylcyclohexane-1,1-diyl)diacetic acid	Organic acids and derivatives	Carboxylic acids and derivatives
2,2'-(3-methylcyclohexane-1,1-diyl)diacetic acid	Organic acids and derivatives	Carboxylic acids and derivatives
1-O-Caffeoylquinic acid	Organic oxygen compounds	Organooxygen compounds
2,3-dinor Prostaglandin E1	Lipids and lipid-like molecules	Fatty Acyls
2,3-dinor Prostaglandin E1	Lipids and lipid-like molecules	Fatty Acyls
Enicoflavine	Organoheterocyclic compounds	Lactones
Leu Asp Trp
Thiofanox	Organic acids and derivatives	Carboximidic acids and derivatives
Baicalein	Phenylpropanoids and polyketides	Flavonoids
Flumioxazin	Organoheterocyclic compounds	Benzoxazines
Nonate	Lipids and lipid-like molecules	Fatty Acyls
N-Benzooxazol-2-yl-guanidine	Organoheterocyclic compounds	Benzoxazoles
trifluoroacetic acid	Organic acids and derivatives	Carboxylic acids and derivatives
9E,12Z,15E-octadecatrienoic acid	Lipids and lipid-like molecules	Fatty Acyls
(-)-11-Hydroxy-9,15,16-trioxooctadecanoic acid	Lipids and lipid-like molecules	Fatty Acyls
Arg Asn Arg	Organic acids and derivatives	Carboxylic acids and derivatives
Imiquimod	Organoheterocyclic compounds	Quinolines and derivatives
Rosmarinate	Phenylpropanoids and polyketides	Cinnamic acids and derivatives
Ethyl 7-epi-12-hydroxyjasmonate glucoside	Lipids and lipid-like molecules	Fatty Acyls
Methylgingerol	Benzenoids	Benzene and substituted derivatives
2,3-dimethyl-3-hydroxy-glutaric acid	Lipids and lipid-like molecules	Fatty Acyls
2,3-dimethyl-3-hydroxy-glutaric acid	Lipids and lipid-like molecules	Fatty Acyls
Myricetin 7,3',4'-trimethyl ether	Phenylpropanoids and polyketides	Flavonoids
7,8-dihydroxy stearic acid	Lipids and lipid-like molecules	Fatty Acyls
17beta-Hydroxy-4-mercaptoandrost-4-en-3-one 4-acetate 17-propionate	Lipids and lipid-like molecules	Steroids and steroid derivatives
Abu-TyrMe-OH
Trp Cys Glu	Organic acids and derivatives	Carboxylic acids and derivatives
Malic acid	Organic acids and derivatives	Hydroxy acids and derivatives
Quercetin 3-(3'',4''-diacetylrhamnosyl)-(1->6)-glucoside	Phenylpropanoids and polyketides	Flavonoids
Triamcinolone acetonide sulfate
Glu Arg Glu	Organic acids and derivatives	Carboxylic acids and derivatives
Trp Thr Pro	Organic acids and derivatives	Carboxylic acids and derivatives
5,7-Dihydro-2-methylthieno[3,4-d]pyrimidine	Organoheterocyclic compounds	Thienopyrimidines
Lys Met Glu
Glu Trp Pro
Trp Ile Thr	Organic acids and derivatives	Carboxylic acids and derivatives
b-D-Glucuronopyranosyl-(1->3)-a-D-galacturonopyranosyl-(1->2)-L-rhamnose	Organic oxygen compounds	Organooxygen compounds
Polyethylene, oxidized
2,3-dinor Thromboxane B1	Organic acids and derivatives	Hydroxy acids and derivatives
Polyethylene, oxidized
(±)-Camphoric acid	Organic acids and derivatives	Carboxylic acids and derivatives
N-benzyl-1-methyl-1H-pyrazolo[3,4-d]pyrimidin-4-amine
DL-b-Hydroxycaprylic acid	Lipids and lipid-like molecules	Fatty Acyls
Tyr Ile Lys	Organic acids and derivatives	Carboxylic acids and derivatives
Pro Arg Ala
6-keto Prostaglandin F1α-d4
Pro Arg Ala
PA(17:1(9Z)/0:0)	Lipids and lipid-like molecules	Glycerophospholipids
Tetranor Iloprost
γ- 12,13-DiHODE	Lipids and lipid-like molecules	Fatty Acyls
γ- 12,13-DiHODE	Lipids and lipid-like molecules	Fatty Acyls
Glu Lys Thr	Organic acids and derivatives	Carboxylic acids and derivatives
Phe4Cl-Met-OH
PS(21:0/0:0)	Lipids and lipid-like molecules	Glycerophospholipids
PI(18:2(9Z,12Z)/0:0)	Lipids and lipid-like molecules	Glycerophospholipids
Lauryl hydrogen sulfate
PI(16:0/0:0)	Lipids and lipid-like molecules	Glycerophospholipids
PI(18:1(9Z)/0:0)	Lipids and lipid-like molecules	Glycerophospholipids
6-pentadecyl Salicylic Acid	Benzenoids	Benzene and substituted derivatives
DG(15:0/18:3(9Z,12Z,15Z)/0:0)	Lipids and lipid-like molecules	Fatty Acyls
DG(16:0/17:2(9Z,12Z)/0:0)[iso2]	Lipids and lipid-like molecules	Glycerolipids
DG(16:0/17:2(9Z,12Z)/0:0)[iso2]	Lipids and lipid-like molecules	Glycerolipids
